# Supplementary material
Source: ML conference proceedings conference paper supplement (https://openaccess.thecvf.com/content/ICCV2025/html/Peng_Chimera_Improving_Generalist_ICCV_2025_paper.html)
Supplement: Supplementary file 1 [file Peng_Chimera_Improving_Generalist_ICCV_2025_supplemental.pdf]

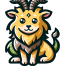

# Chimera: Improving Generalist Model with Domain-Specific Experts

## Supplementary Material

Due to the eight-page limitation of the main text, we provide more details and visualizations from the following aspects:

- Sec. 1: Selection strategy for pre-training tasks and expert models.
- Sec. 2: Dataset Details in training.
- Sec. 3: Chimera’s performance on general tasks.
- Sec. 4: Details about preference optimization.
- Sec. 5: Experiment results on mask ratio selection.
- Sec. 6: Introduction of Table-SE and Doc-SE.
- Sec. 7: Experiments of scaling up more experts.
- Sec. 8: Comparison with existing works.
- Sec. 9: More information of implementation details.
- Sec. 10: Visualization of Chimera’s visual content extraction performance.

### 1. Pre-training Tasks and Expert Models

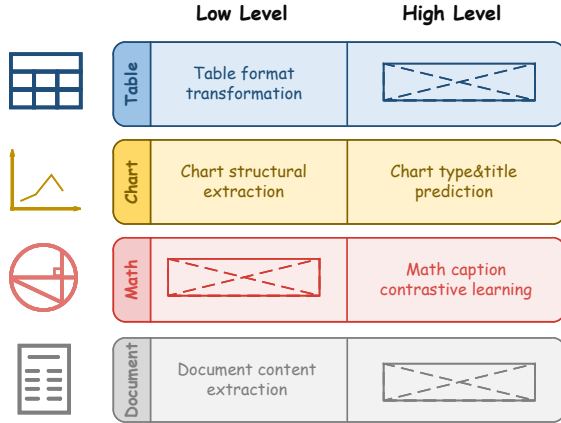

Figure 1. Pre-training tasks of expert models considered by Chimera.

The type of pre-training task significantly affects model performance, which we consider when selecting expert models. As shown in Fig. 1, we categorize low-level tasks as the precise extraction of domain-specific visual content and structure (e.g., Table2LaTeX, Chart2Markdown, Doc2Markdown), while high-level tasks involve understanding and summarizing image content. We select expert models with diverse pre-training task configurations. For the table expert, we use the encoder from StructE-qTable [39], which effectively converts table images into LaTeX/HTML. For the chart expert, we choose the encoder from ChartVLM [40], which excels in structural extraction and chart type classification. For the math expert, we adopt Math-CLIP [43], trained on extensive geometry and func-

|          |                                                                                                                                                                                                                                                                              |
|----------|------------------------------------------------------------------------------------------------------------------------------------------------------------------------------------------------------------------------------------------------------------------------------|
| Stage 1  | <b>General:</b><br>ShareGPT4v [4], ShareGPT4-o [4]                                                                                                                                                                                                                           |
|          | <b>Table:</b><br>TableX [39]                                                                                                                                                                                                                                                 |
|          | <b>Chart:</b><br>ChartQA [27], PlotQA [30], ChartX [40], SimChart [38]                                                                                                                                                                                                       |
|          | <b>Math:</b><br>MAVIS-Caption [43]                                                                                                                                                                                                                                           |
| Stage 2: | <b>Language:</b><br>Kaggle-science-exam [21], MathInstruct [41], MathQA [1], SciInstruct [42], Orcamath [31]                                                                                                                                                                 |
|          | <b>General:</b><br>ShareGPT4v [4], ShareGPT4-o [4], LLaVAR [44], AI2D (GPT4V) [18], AI2D (InternVL [5]), AI2D (Original) [16], MathVision [36], IconQA [24], MapQA [2], ScienceQA [32], ArxivQA [19], TQA [17], CLEVR-Math [10], Super-CLEVR [20], Cambrian Data Engine [35] |
|          | <b>Table:</b><br>TableX [39], TabMWP [26], MMTab [45]                                                                                                                                                                                                                        |
|          | <b>Chart:</b><br>PlotQA [30], ChartX [40], SimChart [38], Chart2Text [14], ChartQA [27], LRV Chart [22], ChartGemma [28], DVQA [12], FigureQA [13], VisText [34]                                                                                                             |
|          | <b>Math:</b><br>MAVIS-Caption [43], Geo170K [7], GeoMVerse [15], MAVIS Manual Collection [43], MAVIS Data Engine [43], Geometry3K [23], GeoQA+ [3], InterGPS [23]                                                                                                            |

Table 1. Dataset used for multi-modal reasoning scenario. **Stage 1** and **Stage 2** represent Domain-General Knowledge Alignment and Visual Instruction Tuning separately.

|                |                                                                    |
|----------------|--------------------------------------------------------------------|
| <b>Stage 1</b> | ChartQA [27], PlotQA [30], ChartX [40], SimChart [38], TableX [39] |
| <b>Stage 2</b> | DocGenome [39], DocStruct4M [9], DocVQA [29]                       |

Table 2. Datasets used for visual content extraction scenario. **Stage 1** represents Domain-General Knowledge Alignment, and **Stage 2** represents Visual Instruction Tuning.

tion caption data. For document structural extraction, we employ the encoder from the latest model, GOT [37].

### 2. Dataset Details

The datasets used for Chimera is presented in Tab. 1 and Tab. 2. All the datasets we used come from publicly accessible datasets.

### 3. Evaluation on General Tasks

We evaluate Chimera’s general capabilities using the perception set from the general benchmark MME [6], with results presented in Tab. 3. Across different model sizes, Chimera and InternVL exhibit varying strengths across different tasks, achieving overall comparable performance.

|                  | InternVL2 |        | Chimera |        |
|------------------|-----------|--------|---------|--------|
|                  | 4B        | 8B     | 4B      | 8B     |
| <b>Existence</b> | 200.00    | 190.00 | 200.00  | 195.00 |
| <b>Count</b>     | 123.33    | 158.33 | 130.00  | 155.00 |
| <b>Position</b>  | 143.33    | 155.00 | 123.33  | 148.33 |
| <b>Color</b>     | 165.00    | 175.00 | 160.00  | 190.00 |
| <b>Posters</b>   | 158.84    | 168.03 | 159.86  | 164.97 |
| <b>Celebrity</b> | 125.00    | 148.53 | 145.29  | 162.65 |
| <b>Scene</b>     | 158.75    | 152.50 | 163.50  | 157.75 |
| <b>Landmark</b>  | 167.25    | 178.25 | 167.25  | 177.75 |
| <b>Artwork</b>   | 144.75    | 154.50 | 144.00  | 153.00 |
| <b>OCR</b>       | 147.50    | 162.50 | 117.50  | 132.50 |

Table 3. Performance on perception sub-tasks of MME.

This suggests that the Chimera framework introduces minimal degradation to the model’s general task capabilities. Meanwhile, Chimera demonstrates strong expertise in domains such as tables, math, charts, and documents, further validating that our proposed approach effectively enhances a generalist LMM’s domain-specific knowledge without compromising its general performance.

#### 4. Details about preference optimization

For preference optimization, we adopt a commonly used approach: we randomly sample 10k problems from MathV-360K, generating 16 responses per problem using Chimera. Each response is classified based on correctness using rule-based answer matching, and after filtering, we construct 60k preference pairs for Direct Preference Optimization (DPO) training. Then we perform DPO training on 60K data for 1 epoch.

#### 5. Mask Ratio Selection

| Model               | Ratio | ALL         | General     | Chart       | Table       | Math        |
|---------------------|-------|-------------|-------------|-------------|-------------|-------------|
| InternVL2-4B [5]    | N/A   | 57.0        | 50.1        | 66.2        | 65.7        | 58.3        |
| InternVL2-4B-NF [5] | N/A   | 58.5        | 51.5        | 67.1        | <b>74.3</b> | 58.6        |
| Chimera-4B-0.0      | 0.0   | 59.4        | 50.8        | 66.2        | 67.1        | 65.5        |
| Chimera-4B          | 0.3   | <b>61.3</b> | <b>54.0</b> | 64.8        | 72.9        | <b>66.9</b> |
| Chimera-4B-0.5      | 0.5   | 60.4        | 51.3        | <b>68.5</b> | 70.0        | 65.8        |
| Chimera-4B-1.0      | 1.0   | 56.2        | 51.5        | 63.5        | 72.9        | 53.6        |

Table 4. Ablation results on different visual content domain on the *testmini* subset of MathVista. InternVL2-4B-NF represents naive finetune of baseline with same settings, Chimera-4B-*R* means Chimera model trained with mask ratio *R* in GSCM.

We conducted an ablation study on 4B scale models to assess our approach’s effectiveness, as shown in Table 4. It should be noted that model with mask ratio 1.0 does not have access to the general encoder during training, contrary to our intentions. Thus, we modified this case to give the model an 80% probability of masking all general features. The results show that naively finetuning the LMM leads to limited performance improvement. By incorporat-

ing domain knowledge from expert models, even the case without GSCM still yields better results than naive finetuning. As the mask ratio increases, the model’s performance improves initially and then declines. This indicates that slightly masking helps balance encoder optimization, leading to better alignment. However, as the mask ratio increase, we believe excessive masking prevents the model from effectively learning to utilize both features for reasoning. Based on the above observations, we set the mask ratio to 0.3 in Chimera’s implementation. We also observed that performance trends vary across domains as the mask ratio changes, suggesting that the alignment difficulty of expert models differs by domain and task, which we leave for future exploration.

#### 6. Details of Table-SE and Doc-SE

In Tables 7 and 8 of the main text, we conduct the experiments on Table Structural Extraction (Table-SE) task and Document Structural Extraction (Doc-SE) task, respectively. In this section, we primarily introduce the evaluation dataset construction method and provide detailed information about the dataset.

##### 6.1. Data Source

|                            | Count |
|----------------------------|-------|
| <b>Document Categories</b> |       |
| PPT2PDF                    | 43    |
| Academic Literature        | 42    |
| Book                       | 13    |
| Colorful Textbook          | 37    |
| Magazine                   | 30    |
| Exam Paper                 | 7     |
| Note                       | 18    |
| Newspaper                  | 15    |
| <b>Language</b>            |       |
| Simplified Chinese         | 128   |
| English                    | 77    |
| <b>Layout</b>              |       |
| 1 and More Column          | 27    |
| Single Column              | 91    |
| Other Layout               | 43    |
| Double Column              | 40    |
| Three Column               | 4     |
| # Total                    | 205   |

Table 5. Statistical information of Doc-SE.

Our benchmark was developed through a systematic sampling process from an initial collection of 200,000 PDF documents sourced from Common Crawl, Google, Baidu search engines, and internal repositories. We initially extracted visual features using ResNet-50 [8] and performed clustering algorithm using Faiss [11] to identify diverse document patterns. From the 10 cluster centers, we sampled 6,000 visually diverse pages, which were then man-

|                         | Count |
|-------------------------|-------|
| <b>Background</b>       |       |
| w/o Background          | 80    |
| w/ Background           | 20    |
| <b>Equation</b>         |       |
| w/o Equation            | 78    |
| w/ Equation             | 22    |
| <b>Language</b>         |       |
| English                 | 45    |
| English & Chinese Mixed | 5     |
| Chinese                 | 50    |
| <b>Table Format</b>     |       |
| Three-line Table        | 47    |
| Full-bordered Table     | 39    |
| Partial-bordered Table  | 14    |
| w/o Merged Cells        | 58    |
| w/ Merged Cells         | 42    |
| <b>Layout</b>           |       |
| Horizontal              | 97    |
| Vertical                | 3     |
| # Total                 | 100   |

Table 6. Statistical information of Table-SE.

ually annotated with attributes such as page type, layout type, and language. As illustrated in Table 5 and Table 6, the final benchmark includes 205 page-level PDF images and 100 table images, ensuring comprehensive representation of real-world document scenarios with various layouts and attributes.

## 6.2. Annotation Process

For ensuring annotation quality and efficiency, we design separate standardized processes for page-level PDF documents and tables.

For page-level PDF documents, our process consists of three stages: (1) We first employ fine-tuned LayoutLMv3 for layout detection and PaddleOCR for text recognition as intelligent pre-annotation. (2) Professional annotators then refine the detection boxes, verify text content accuracy, and enhance annotations with reading order and affiliation details. (3) Finally, researchers review the annotations to ensure overall quality and accuracy.

For table annotations, we follow a similar but specialized three-stage approach: (1) We utilize GPT-4o and PaddleOCR for initial table annotations. (2) Annotators then verify and correct the table structure and content, using specialized tools like Tables Generator for verification. (3) Finally, experts through table annotations re-rendering to ensure correct HTML and LaTeX code labels.

## 6.3. Showcase

We provide several visualization examples of Table-SE in Fig. 2 and Fig. 3, where each item contains a visual table and its corresponding LaTeX code.

## 7. Experiments of Scaling Up More Experts

| Model                        | ALL  | General | Chart | Table | Math |
|------------------------------|------|---------|-------|-------|------|
| InternVL2-4B                 | 57.0 | 50.1    | 66.2  | 65.7  | 58.3 |
| InternVL2-4B w/ Chart Expert | 59.4 | 52.0    | 68.0  | 72.9  | 60.8 |
| Chimera-4B                   | 61.3 | 54.0    | 64.8  | 72.9  | 66.9 |

Table 7. Accuracy scores of different visual content domain on the *testmini* subset of MathVista. Those do not belong to the last three domains are uniformly classified as General for simplicity. InternVL2-4B w/ Chart Expert represent the case only integrating chart expert model.

To further validate the impact of scaling up the number of expert models, we provide ablation results introducing only the chart expert. In this case, non-chart data is encoded solely by the general encoder during training. As shown in Table 7, incorporating only the chart expert obtains lower MathVista [25] overall score by 1.9 points than Chimera-4B.

Specifically, InternVL2-4B w/ Chart Expert also shows improvements in general scenarios, though less significant than Chimera, which integrates three expert models. In the chart domain, InternVL2-4B w/ Chart Expert achieves notable gains by avoiding conflicts among multiple experts with large task gaps. However, Chimera’s integration of multiple experts enhances performance across diverse domains, boosting overall results. In the math domain, InternVL2-4B w/ Chart Expert scores 6.1 points lower than Chimera, demonstrating the strong mathematical reasoning capabilities derived from integrating the math expert.

## 8. Comparison with existing works

Integrating specialist experts that contain specialized prior knowledge presents a promising approach to improve the specific capabilities of generalist model. MoVA [46] proposes a multi-turn method that relies on the language model to call an expert in the first round and generates responses in the second, which reduces conciseness and efficiency. MoME [33] uses soft-weighting to fuse multiple visual encoders, enabling VLMs to benefit from leveraging representations from different encoders. However, this approach lacks explicit guidance for encoder selection and introduces additional concerns such as inference efficiency and uniform visual feature sizes.

## 9. Training Configuration

The training strategy is summarized in Tab 8 and Tab 9. During the two-stage training process, we gradually increase the maximum image resolution and the number of visual tokens of the general visual encoder  $E^g$ . In the Domain-General Knowledge Alignment stage, we use

## Visual Table

|                                                 | Beef meat |          |      |           | Chicken meat |          |      |           | Pork meat |          |      |           |
|-------------------------------------------------|-----------|----------|------|-----------|--------------|----------|------|-----------|-----------|----------|------|-----------|
|                                                 | Cases     | Controls | OR   | 95% CI    | Cases        | Controls | OR   | 95% CI    | Cases     | Controls | OR   | 95% CI    |
| Never Exposed (Ref group)                       | 1,823     | 2,273    | 1.00 |           | 1,823        | 2,273    | 1.00 |           | 1,823     | 2,273    | 1.00 |           |
| Ever Exposed                                    | 117       | 108      | 1.22 | 0.90-1.67 | 136          | 129      | 1.19 | 0.91-1.55 | 145       | 143      | 1.09 | 0.83-1.42 |
| Duration of exposure                            |           |          |      |           |              |          |      |           |           |          |      |           |
| <5 years                                        | 40        | 37       | 1.45 | 0.92-2.31 | 30           | 40       | 0.97 | 0.60-1.58 | 39        | 41       | 1.25 | 0.80-1.96 |
| 6-15 years                                      | 29        | 43       | 0.79 | 0.47-1.31 | 42           | 41       | 1.21 | 0.78-1.88 | 44        | 58       | 0.84 | 0.55-1.28 |
| >16 years                                       | 48        | 28       | 1.63 | 0.95-2.88 | 64           | 48       | 1.36 | 0.90-2.06 | 61        | 43       | 1.28 | 0.81-2.03 |
| p-value of test for linear trend (with ref cat) |           |          | 0.23 |           |              |          | 0.11 |           |           |          | 0.54 |           |
| Intensity of exposure                           |           |          |      |           |              |          |      |           |           |          |      |           |
| Low                                             | 60        | 59       | 1.26 | 0.86-1.83 | 71           | 68       | 1.24 | 0.88-1.75 | 70        | 72       | 1.15 | 0.82-1.62 |
| Medium                                          | 42        | 35       | 1.22 | 0.73-2.04 | 47           | 46       | 1.11 | 0.72-1.71 | 55        | 52       | 1.03 | 0.68-1.58 |
| High                                            | 15        | 14       | 0.91 | 0.35-2.40 | 18           | 15       | 1.22 | 0.56-2.65 | 20        | 19       | 0.89 | 0.40-1.94 |
| p-value of test for linear trend (with ref cat) |           |          | 0.36 |           |              |          | 0.29 |           |           |          | 0.78 |           |

| AED           | MES test                  |              | Pentylenetetrazol         |               | Bicuculline               |               | Picrotoxin                |               | Strychnine                |               |
|---------------|---------------------------|--------------|---------------------------|---------------|---------------------------|---------------|---------------------------|---------------|---------------------------|---------------|
|               | ED <sub>50</sub> (95% CI) | PI           | ED <sub>50</sub> (95% CI) | PI            | ED <sub>50</sub> (95% CI) | PI            | ED <sub>50</sub> (95% CI) | PI            | ED <sub>50</sub> (95% CI) | PI            |
| Rofenofen     | 15.1 (12.5-18.1)          | >32.2        | 54.0 (37.8-72.1)          | >9.3          | 76.3 (54.8-97.7)          | >9.3          | 10.1 (7.0-13.2)           | >9.3          | 10.1 (7.0-13.2)           | >9.3          |
| AED           | 600 (515-72.1)            | 9.5 (8-10.4) | 4.9 (3.9-6.0)             | 300 (230-390) | 1.8 (1.5-2.1)             | 1.8 (1.5-2.1) | 1.8 (1.5-2.1)             | 1.8 (1.5-2.1) | 1.8 (1.5-2.1)             | 1.8 (1.5-2.1) |
| Phenytoin     | 6.9 (5.8-7.9)             | 3.2          | 12.2 (8.5-15.9)           | 3.2           | 37.7 (26.5-48.9)          | 1.8           | 37.7 (26.5-48.9)          | 2.5           | 35-100 <sup>a</sup>       | NA            |
| Phenobarbital | 44.8 (38.1-50.3)          | 1.0          | 18.6 (16.1-21.1)          | 3.4           | 18.6 (16.1-21.1)          | 3.4           | 18.6 (16.1-21.1)          | 3.4           | 250 (191.3-365.0)         | 0.7           |
| Ethosuximide  | 44.8 (38.1-50.3)          | 1.0          | 18.6 (16.1-21.1)          | 3.4           | 18.6 (16.1-21.1)          | 3.4           | 18.6 (16.1-21.1)          | 3.4           | 250 (191.3-365.0)         | 0.7           |
| Valproic acid | 44.8 (38.1-50.3)          | 1.0          | 18.6 (16.1-21.1)          | 3.4           | 18.6 (16.1-21.1)          | 3.4           | 18.6 (16.1-21.1)          | 3.4           | 250 (191.3-365.0)         | 0.7           |
| Carbamazepine | 44.8 (38.1-50.3)          | 1.0          | 18.6 (16.1-21.1)          | 3.4           | 18.6 (16.1-21.1)          | 3.4           | 18.6 (16.1-21.1)          | 3.4           | 250 (191.3-365.0)         | 0.7           |
| Topiramate    | 44.8 (38.1-50.3)          | 1.0          | 18.6 (16.1-21.1)          | 3.4           | 18.6 (16.1-21.1)          | 3.4           | 18.6 (16.1-21.1)          | 3.4           | 250 (191.3-365.0)         | 0.7           |
| Levetiracetam | 44.8 (38.1-50.3)          | 1.0          | 18.6 (16.1-21.1)          | 3.4           | 18.6 (16.1-21.1)          | 3.4           | 18.6 (16.1-21.1)          | 3.4           | 250 (191.3-365.0)         | 0.7           |
| Primidone     | 44.8 (38.1-50.3)          | 1.0          | 18.6 (16.1-21.1)          | 3.4           | 18.6 (16.1-21.1)          | 3.4           | 18.6 (16.1-21.1)          | 3.4           | 250 (191.3-365.0)         | 0.7           |
| Clonazepam    | 44.8 (38.1-50.3)          | 1.0          | 18.6 (16.1-21.1)          | 3.4           | 18.6 (16.1-21.1)          | 3.4           | 18.6 (16.1-21.1)          | 3.4           | 250 (191.3-365.0)         | 0.7           |
| Valproic acid | 44.8 (38.1-50.3)          | 1.0          | 18.6 (16.1-21.1)          | 3.4           | 18.6 (16.1-21.1)          | 3.4           | 18.6 (16.1-21.1)          | 3.4           | 250 (191.3-365.0)         | 0.7           |
| Carbamazepine | 44.8 (38.1-50.3)          | 1.0          | 18.6 (16.1-21.1)          | 3.4           | 18.6 (16.1-21.1)          | 3.4           | 18.6 (16.1-21.1)          | 3.4           | 250 (191.3-365.0)         | 0.7           |
| Topiramate    | 44.8 (38.1-50.3)          | 1.0          | 18.6 (16.1-21.1)          | 3.4           | 18.6 (16.1-21.1)          | 3.4           | 18.6 (16.1-21.1)          | 3.4           | 250 (191.3-365.0)         | 0.7           |
| Levetiracetam | 44.8 (38.1-50.3)          | 1.0          | 18.6 (16.1-21.1)          | 3.4           | 18.6 (16.1-21.1)          | 3.4           | 18.6 (16.1-21.1)          | 3.4           | 250 (191.3-365.0)         | 0.7           |
| Primidone     | 44.8 (38.1-50.3)          | 1.0          | 18.6 (16.1-21.1)          | 3.4           | 18.6 (16.1-21.1)          | 3.4           | 18.6 (16.1-21.1)          | 3.4           | 250 (191.3-365.0)         | 0.7           |
| Clonazepam    | 44.8 (38.1-50.3)          | 1.0          | 18.6 (16.1-21.1)          | 3.4           | 18.6 (16.1-21.1)          | 3.4           | 18.6 (16.1-21.1)          | 3.4           | 250 (191.3-365.0)         | 0.7           |
| Valproic acid | 44.8 (38.1-50.3)          | 1.0          | 18.6 (16.1-21.1)          | 3.4           | 18.6 (16.1-21.1)          | 3.4           | 18.6 (16.1-21.1)          | 3.4           | 250 (191.3-365.0)         | 0.7           |
| Carbamazepine | 44.8 (38.1-50.3)          | 1.0          | 18.6 (16.1-21.1)          | 3.4           | 18.6 (16.1-21.1)          | 3.4           | 18.6 (16.1-21.1)          | 3.4           | 250 (191.3-365.0)         | 0.7           |
| Topiramate    | 44.8 (38.1-50.3)          | 1.0          | 18.6 (16.1-21.1)          | 3.4           | 18.6 (16.1-21.1)          | 3.4           | 18.6 (16.1-21.1)          | 3.4           | 250 (191.3-365.0)         | 0.7           |
| Levetiracetam | 44.8 (38.1-50.3)          | 1.0          | 18.6 (16.1-21.1)          | 3.4           | 18.6 (16.1-21.1)          | 3.4           | 18.6 (16.1-21.1)          | 3.4           | 250 (191.3-365.0)         | 0.7           |
| Primidone     | 44.8 (38.1-50.3)          | 1.0          | 18.6 (16.1-21.1)          | 3.4           | 18.6 (16.1-21.1)          | 3.4           | 18.6 (16.1-21.1)          | 3.4           | 250 (191.3-365.0)         | 0.7           |
| Clonazepam    | 44.8 (38.1-50.3)          | 1.0          | 18.6 (16.1-21.1)          | 3.4           | 18.6 (16.1-21.1)          | 3.4           | 18.6 (16.1-21.1)          | 3.4           | 250 (191.3-365.0)         | 0.7           |
| Valproic acid | 44.8 (38.1-50.3)          | 1.0          | 18.6 (16.1-21.1)          | 3.4           | 18.6 (16.1-21.1)          | 3.4           | 18.6 (16.1-21.1)          | 3.4           | 250 (191.3-365.0)         | 0.7           |
| Carbamazepine | 44.8 (38.1-50.3)          | 1.0          | 18.6 (16.1-21.1)          | 3.4           | 18.6 (16.1-21.1)          | 3.4           | 18.6 (16.1-21.1)          | 3.4           | 250 (191.3-365.0)         | 0.7           |
| Topiramate    | 44.8 (38.1-50.3)          | 1.0          | 18.6 (16.1-21.1)          | 3.4           | 18.6 (16.1-21.1)          | 3.4           | 18.6 (16.1-21.1)          | 3.4           | 250 (191.3-365.0)         | 0.7           |
| Levetiracetam | 44.8 (38.1-50.3)          | 1.0          | 18.6 (16.1-21.1)          | 3.4           | 18.6 (16.1-21.1)          | 3.4           | 18.6 (16.1-21.1)          | 3.4           | 250 (191.3-365.0)         | 0.7           |
| Primidone     | 44.8 (38.1-50.3)          | 1.0          | 18.6 (16.1-21.1)          | 3.4           | 18.6 (16.1-21.1)          | 3.4           | 18.6 (16.1-21.1)          | 3.4           | 250 (191.3-365.0)         | 0.7           |
| Clonazepam    | 44.8 (38.1-50.3)          | 1.0          | 18.6 (16.1-21.1)          | 3.4           | 18.6 (16.1-21.1)          | 3.4           | 18.6 (16.1-21.1)          | 3.4           | 250 (191.3-365.0)         | 0.7           |
| Valproic acid | 44.8 (38.1-50.3)          | 1.0          | 18.6 (16.1-21.1)          | 3.4           | 18.6 (16.1-21.1)          | 3.4           | 18.6 (16.1-21.1)          | 3.4           | 250 (191.3-365.0)         | 0.7           |
| Carbamazepine | 44.8 (38.1-50.3)          | 1.0          | 18.6 (16.1-21.1)          | 3.4           | 18.6 (16.1-21.1)          | 3.4           | 18.6 (16.1-21.1)          | 3.4           | 250 (191.3-365.0)         | 0.7           |
| Topiramate    | 44.8 (38.1-50.3)          | 1.0          | 18.6 (16.1-21.1)          | 3.4           | 18.6 (16.1-21.1)          | 3.4           | 18.6 (16.1-21.1)          | 3.4           | 250 (191.3-365.0)         | 0.7           |
| Levetiracetam | 44.8 (38.1-50.3)          | 1.0          | 18.6 (16.1-21.1)          | 3.4           | 18.6 (16.1-21.1)          | 3.4           | 18.6 (16.1-21.1)          | 3.4           | 250 (191.3-365.0)         | 0.7           |
| Primidone     | 44.8 (38.1-50.3)          | 1.0          | 18.6 (16.1-21.1)          | 3.4           | 18.6 (16.1-21.1)          | 3.4           | 18.6 (16.1-21.1)          | 3.4           | 250 (191.3-365.0)         | 0.7           |
| Clonazepam    | 44.8 (38.1-50.3)          | 1.0          | 18.6 (16.1-21.1)          | 3.4           | 18.6 (16.1-21.1)          | 3.4           | 18.6 (16.1-21.1)          | 3.4           | 250 (191.3-365.0)         | 0.7           |
| Valproic acid | 44.8 (38.1-50.3)          | 1.0          | 18.6 (16.1-21.1)          | 3.4           | 18.6 (16.1-21.1)          | 3.4           | 18.6 (16.1-21.1)          | 3.4           | 250 (191.3-365.0)         | 0.7           |
| Carbamazepine | 44.8 (38.1-50.3)          | 1.0          | 18.6 (16.1-21.1)          | 3.4           | 18.6 (16.1-21.1)          | 3.4           | 18.6 (16.1-21.1)          | 3.4           | 250 (191.3-365.0)         | 0.7           |
| Topiramate    | 44.8 (38.1-50.3)          | 1.0          | 18.6 (16.1-21.1)          | 3.4           | 18.6 (16.1-21.1)          | 3.4           | 18.6 (16.1-21.1)          | 3.4           | 250 (191.3-365.0)         | 0.7           |
| Levetiracetam | 44.8 (38.1-50.3)          | 1.0          | 18.6 (16.1-21.1)          | 3.4           | 18.6 (16.1-21.1)          | 3.4           | 18.6 (16.1-21.1)          | 3.4           | 250 (191.3-365.0)         | 0.7           |
| Primidone     | 44.8 (38.1-50.3)          | 1.0          | 18.6 (16.1-21.1)          | 3.4           | 18.6 (16.1-21.1)          | 3.4           | 18.6 (16.1-21.1)          | 3.4           | 250 (191.3-365.0)         | 0.7           |
| Clonazepam    | 44.8 (38.1-50.3)          | 1.0          | 18.6 (16.1-21.1)          | 3.4           | 18.6 (16.1-21.1)          | 3.4           | 18.6 (16.1-21.1)          | 3.4           | 250 (191.3-365.0)         | 0.7           |
| Valproic acid | 44.8 (38.1-50.3)          | 1.0          | 18.6 (16.1-21.1)          | 3.4           | 18.6 (16.1-21.1)          | 3.4           | 18.6 (16.1-21.1)          | 3.4           | 250 (191.3-365.0)         | 0.7           |
| Carbamazepine | 44.8 (38.1-50.3)          | 1.0          | 18.6 (16.1-21.1)          | 3.4           | 18.6 (16.1-21.1)          | 3.4           | 18.6 (16.1-21.1)          | 3.4           | 250 (191.3-365.0)         | 0.7           |
| Topiramate    | 44.8 (38.1-50.3)          | 1.0          | 18.6 (16.1-21.1)          | 3.4           | 18.6 (16.1-21.1)          | 3.4           | 18.6 (16.1-21.1)          | 3.4           | 250 (191.3-365.0)         | 0.7           |
| Levetiracetam | 44.8 (38.1-50.3)          | 1.0          | 18.6 (16.1-21.1)          | 3.4           | 18.6 (16.1-21.1)          | 3.4           | 18.6 (16.1-21.1)          | 3.4           | 250 (191.3-365.0)         | 0.7           |
| Primidone     | 44.8 (38.1-50.3)          | 1.0          | 18.6 (16.1-21.1)          | 3.4           | 18.6 (16.1-21.1)          | 3.4           | 18.6 (16.1-21.1)          | 3.4           | 250 (191.3-365.0)         | 0.7           |
| Clonazepam    | 44.8 (38.1-50.3)          | 1.0          | 18.6 (16.1-21.1)          | 3.4           | 18.6 (16.1-21.1)          | 3.4           | 18.6 (16.1-21.1)          | 3.4           | 250 (191.3-365.0)         | 0.7           |
| Valproic acid | 44.8 (38.1-50.3)          | 1.0          | 18.6 (16.1-21.1)          | 3.4           | 18.6 (16.1-21.1)          | 3.4           | 18.6 (16.1-21.1)          | 3.4           | 250 (191.3-365.0)         | 0.7           |
| Carbamazepine | 44.8 (38.1-50.3)          | 1.0          | 18.6 (16.1-21.1)          | 3.4           | 18.6 (16.1-21.1)          | 3.4           | 18.6 (16.1-21.1)          | 3.4           | 250 (191.3-365.0)         | 0.7           |
| Topiramate    | 44.8 (38.1-50.3)          | 1.0          | 18.6 (16.1-21.1)          | 3.4           | 18.6 (16.1-21.1)          | 3.4           | 18.6 (16.1-21.1)          | 3.4           | 250 (191.3-365.0)         | 0.7           |
| Levetiracetam | 44.8 (38.1-50.3)          | 1.0          | 18.6 (16.1-21.1)          | 3.4           | 18.6 (16.1-21.1)          | 3.4           | 18.6 (16.1-21.1)          | 3.4           | 250 (191.3-365.0)         | 0.7           |
| Primidone     | 44.8 (38.1-50.3)          | 1.0          | 18.6 (16.1-21.1)          | 3.4           | 18.6 (16.1-21.1)          | 3.4           | 18.6 (16.1-21.1)          | 3.4           | 250 (191.3-365.0)         | 0.7           |
| Clonazepam    | 44.8 (38.1-50.3)          | 1.0          | 18.6 (16.1-21.1)          | 3.4           | 18.6 (16.1-21.1)          | 3.4           | 18.6 (16.1-21.1)          | 3.4           | 250 (191.3-365.0)         | 0.7           |
| Valproic acid | 44.8 (38.1-50.3)          | 1.0          | 18.6 (16.1-21.1)          | 3.4           | 18.6 (16.1-21.1)          | 3.4           | 18.6 (16.1-21.1)          | 3.4           | 250 (191.3-365.0)         | 0.7           |
| Carbamazepine | 44.8 (38.1-50.3)          | 1.0          | 18.6 (16.1-21.1)          | 3.4           | 18.6 (16.1-21.1)          | 3.4           | 18.6 (16.1-21.1)          | 3.4           | 250 (191.3-365.0)         | 0.7           |
| Topiramate    | 44.8 (38.1-50.3)          | 1.0          | 18.6 (16.1-21.1)          | 3.4           | 18.6 (16.1-21.1)          | 3.4           | 18.6 (16.1-21.1)          | 3.4           | 250 (191.3-365.0)         | 0.7           |
| Levetiracetam | 44.8 (38.1-50.3)          | 1.0          | 18.6 (16.1-21.1)          | 3.4           | 18.6 (16.1-21.1)          | 3.4           | 18.6 (16.1-21.1)          | 3.4           | 250 (191.3-365.0)         | 0.7           |
| Primidone     | 44.8 (38.1-50.3)          | 1.0          | 18.6 (16.1-21.1)          | 3.4           | 18.6 (16.1-21.1)          | 3.4           | 18.6 (16.1-21.1)          | 3.4           | 250 (191.3-365.0)         | 0.7           |
| Clonazepam    | 44.8 (38.1-50.3)          | 1.0          | 18.6 (16.1-21.1)          | 3.4           | 18.6 (16.1-21.1)          | 3.4           | 18.6 (16.1-21.1)          | 3.4           | 250 (191.3-365.0)         | 0.7           |
| Valproic acid | 44.8 (38.1-50.3)          | 1.0          | 18.6 (16.1-21.1)          | 3.4           | 18.6 (16.1-21.1)          | 3.4           | 18.6 (16.1-21.1)          | 3.4           | 250 (191.3-365.0)         | 0.7           |
| Carbamazepine | 44.8 (38.1-50.3)          | 1.0          | 18.6 (16.1-21.1)          | 3.4           | 18.6 (16.1-21.1)          | 3.4           | 18.6 (16.1-21.1)          | 3.4           | 250 (191.3-365.0)         | 0.7           |
| Topiramate    | 44.8 (38.1-50.3)          | 1.0          | 18.6 (16.1-21.1)          | 3.4           | 18.6 (16.1-21.1)          | 3.4           | 18.6 (16.1-21.1)          | 3.4           | 250 (191.3-365.0)         | 0.7           |
| Levetiracetam | 44.8 (38.1-50.3)          | 1.0          | 18.6 (16.1-21.1)          | 3.4           | 18.6 (16.1-21.1)          | 3.4           | 18.6 (16.1-21.1)          | 3.4           | 250 (191.3-365.0)         | 0.7           |
| Primidone     | 44.8 (38.1-50.3)          | 1.0          | 18.6 (16.1-21.1)          | 3.4           | 18.6 (16.1-21.1)          | 3.4           | 18.6 (16.1-21.1)          | 3.4           | 250 (191.3-365.0)         | 0.7           |
| Clonazepam    | 44.8 (38.1-50.3)          | 1.0          | 18.6 (16.1-21.1)          | 3.4           | 18.6 (16.1-21.1)          | 3.4           | 18.6 (16.1-21.1)          | 3.4           | 250 (191.3-365.0)         | 0.7           |
| Valproic acid | 44.8 (38.1-50.3)          | 1.0          | 18.6 (16.1-21.1)          | 3.4           | 18.6 (16.1-21.1)          | 3.4           | 18.6 (16.1-21.1)          | 3.4           | 250 (191.3-365.0)         | 0.7           |
| Carbamazepine | 44.8 (38.1-50.3)          | 1.0          | 18.6 (16.1-21.1)          | 3.4           | 18.6 (16.1-21.1)          | 3.4           | 18.6 (16.1-21.1)          | 3.4           | 250 (191.3-365.0)         | 0.7           |
| Topiramate    | 44.8 (38.1-50.3)          | 1.0          | 18.6 (16.1-21.1)          | 3.4           | 18.6 (16.1-21.1)          | 3.4           | 18.6 (16.1-21.1)          | 3.4           | 250 (191.3-365.0)         | 0.7           |
| Levetiracetam | 44.8 (38.1-50.3)          | 1.0          | 18.6 (16.1-21.1)          | 3.4           | 18.6 (16.1-21.1)          | 3.4           | 18.6 (16.1-21.1)          | 3.4           | 250 (191.3-365.0)         | 0.7           |
| Primidone     | 44.8 (38.1-50.3)          | 1.0          | 18.6 (16.1-21.1)          | 3.4           | 18.6 (16.1-21.1)          | 3.4           | 18.6 (16.1-21.1)          | 3.4           | 250 (191.3-365.0)         | 0.7           |
| Clonazepam    | 44.8 (38.1-50.3)          | 1.0          | 18.6 (16.1-21.1)          | 3.4           | 18.6 (16.1-21.1)          | 3.4           | 18.6 (16.1-21.1)          | 3.4           | 250 (191.3-365.0)         | 0.7           |
| Valproic acid | 44.8 (38.1-50.3)          | 1.0          | 18.6 (16.1-21.1)          | 3.4           | 18.6 (16.1-21.1)          | 3.4           | 18.6 (16.1-21.1)          | 3.4           | 250 (191.3-365.0)         | 0.7           |
| Carbamazepine | 44.8 (38.1-50.3)          | 1.0          | 18.6 (16.1-21.1)          | 3.4           | 18.6 (16.1-21.1)          | 3.4           | 18.6 (16.1-21.1)          | 3.4           | 250 (191.3-365.0)         | 0.7           |
| Topiramate    | 44.8 (38.1-50.3)          | 1.0          | 18.6 (16.1-21.1)          | 3.4           | 18.6 (16.1-21.1)          | 3.4           | 18.6 (16.1-21.1)          | 3.4           | 250 (191.3-365.0)         | 0.7           |
| Levetiracetam | 44.8 (38.1-50.3)          | 1.0          | 18.6 (16.1-21.1)          | 3.4           | 18.6 (16.1-21.1)          | 3.4           | 18.6 (16.1-21.1)          | 3.4           | 250 (191.3-365.0)         | 0.7           |
| Primidone     | 44.8 (38.1-50.3)          | 1.0          | 18.6 (16.1-21.1)          | 3.4           | 18.6 (16.1-21.1)          | 3.4           | 18.6 (16.1-21.1)          | 3.4           | 250 (191.3-365.0)         | 0.7           |
| Clonazepam    | 44.8 (38.1-50.3)          | 1.0          | 18.6 (16.1-21.1)          | 3.4           | 18.6 (16.1-21.1)          | 3.4           | 18.6 (16.1-21.1)          | 3.4           | 250 (191.3-365.0)         | 0.7           |
| Valproic acid | 44.8 (38.1-50.3)          | 1.0          | 18.6 (16.1-21.1)          | 3.4           | 18.6 (16.1-21.1)          | 3.4           | 18.6 (16.1-21.1)          | 3.4           | 250 (191.3-365.0)         | 0.7           |
| Carbamazepine | 44.8 (38.1-50.3)          | 1.0          | 18.6 (16.1-21.1)          | 3.4           | 18.6 (16.1-21.1)          | 3.4           | 18.6 (16.1-21.1)          | 3.4           | 250 (191.3-365.0)         | 0.7           |
| Topiramate    | 44.8 (38.1-50.3)          | 1.0          | 18.6 (16.1-21.1)          | 3.4           | 18.6 (16.1-21.1)          | 3.4           | 18.6 (16.1-21.1)          | 3.4           | 250 (191.3-365.0)         | 0.7           |
| Levetiracetam | 44.8 (38.1-50.3)          | 1.0          | 18.6 (16.1-21.1)          | 3.4           | 18.6 (16.1-21.1)          | 3.4           | 18.6 (16.1-21.1)          | 3.4           | 250 (191.3-365.0)         | 0.7           |
| Primidone     | 44.8 (38.1-50.3)          | 1.0          | 18.6 (16.1-21.1           |               |                           |               |                           |               |                           |               |

ED<sub>50</sub>, the dose of drug required to produce the desired end point in 50% of animals; CI, confidence interval; PI, protective index (ratio of TD<sub>50</sub> to ED<sub>50</sub>).

## Ground Truth: LaTeX

```

\begin{tabular}{c}
\hline
\multicolumn{4}{c}{Beef meat} & \multicolumn{4}{c}{Chicken meat} & \multicolumn{4}{c}{Pork meat} \\
\hline
\hline
Cases & Controls & OR & 95\% CI & Cases & Controls & OR & 95\% CI & Cases & Controls & OR & 95\% CI \\
\hline
Never Exposed (Ref group) & 1,823 & 2,273 & 1.00 & --- & 1,823 & 2,273 & 1.00 & --- & 1,823 & 2,273 & 1.00 & --- \\
Ever Exposed & 117 & 108 & 1.22 & 0.90-1.67 & 136 & 129 & 1.19 & 0.91-1.55 & 145 & 143 & 1.09 & 0.83-1.42 \\
Duration of exposure & & & & & & & & & & & & \\
<5 years & 40 & 37 & 1.45 & 0.92-2.31 & 30 & 40 & 0.97 & 0.60-1.58 & 39 & 41 & 1.25 & 0.80-1.96 \\
6-15 years & 29 & 43 & 0.79 & 0.47-1.31 & 42 & 41 & 1.21 & 0.78-1.88 & 44 & 58 & 0.84 & 0.55-1.28 \\
>16 years & 48 & 28 & 1.63 & 0.95-2.88 & 64 & 48 & 1.36 & 0.90-2.06 & 61 & 43 & 1.28 & 0.81-2.03 \\
p-value of test for linear trend (with ref cat) & & & 0.23 & & & & 0.11 & & & & & 0.54 \\
Intensity of exposure & & & & & & & & & & & & \\
Low & 60 & 59 & 1.26 & 0.86-1.83 & 71 & 68 & 1.24 & 0.88-1.75 & 70 & 72 & 1.15 & 0.82-1.62 \\
Medium & 42 & 35 & 1.22 & 0.73-2.04 & 47 & 46 & 1.11 & 0.72-1.71 & 55 & 52 & 1.03 & 0.68-1.58 \\
High & 15 & 14 & 0.91 & 0.35-2.40 & 18 & 15 & 1.22 & 0.56-2.65 & 20 & 19 & 0.89 & 0.40-1.94 \\
p-value of test for linear trend (with ref cat) & & & 0.36 & & & & 0.29 & & & & & 0.78
\end{tabular}

```

```

\begin{tabular}{c}
\hline
\multicolumn{12}{c}{Table 1. Anticonvulsant activity and protective index of intraperitoneal AEDs in mice} \\
\hline
\hline
\multicolumn{12}{c}{MES test} \\
\hline
\multicolumn{12}{c}{Phenytoin} \\
\hline
\multicolumn{12}{c}{Bicuculline} \\
\hline
\multicolumn{12}{c}{Strychnine} \\
\hline
\multicolumn{12}{c}{ED50 (95\% CI) mg/kg & ED50 (95\%CI) mg/kg & PI & ED50 (95\%CI) mg/kg & PI} \\
\hline
\multicolumn{12}{c}{Rufinamide & >500<1,000 & 15.5(12.5-18.1) & >32.2 & 54.0(38.1-74.9) & >9.3 & 50.5(23.9-87.8) & >9.9 & 76.3 (64.0-90.7) & >6.6 & 125\textit{textasciicircum}{a} & NA} \\
\hline
\multicolumn{12}{c}{Phenytoin & 65.5(52.5-72.1) & 9.5(8.1-10.4) & 6.9 & 300 no protection & <0.2 & 100 no protection & <0.7 & 100 no protection & <0.7 & 55-100b & <0.7} \\
\hline
\multicolumn{12}{c}{Phenobarbital & 69.0(62.8-72.9) & 21.8(15.0-25.5) & 3.2 & 13.2(5.9-15.9) & 5.2 & 37.7(26.5-47.4) & 1.8 & 27.5 (20.9-34.8) & 2.5 & 95.3 (91.3-99.5) & 0.7} \\
\hline
\multicolumn{12}{c}{Valproate & 425.8(369-450) & 272(247-338) & 1.6 & 148.6(123-177) & 2.9 & 359.9(294-439) & 1.2 & 387.2 (341-444) & 1.1 & 292.9 (261-323) & 1.5} \\
\hline
\multicolumn{12}{c}{Ethosuximide & 440.8(383-485) & 1,000 no protection & 0.4 & 130.3(111-151) & 3.4 & 459.0(350-633) & 1.0 & 243 (228-255) & 1.8 & 250-1,000c & <0.4} \\
\hline
\multicolumn{12}{c}{\{a: Maximum protection, 37.5\%\}} \\
\multicolumn{12}{c}{\{b: protection, 50.0\%\}} \\
\multicolumn{12}{c}{\{c: Maximum protection, 62.5\%\}} \\
\multicolumn{12}{c}{AED, antiepileptic drug; MES, maximal electroshock; TD50, the dose eliciting evidence of minimal neurotoxicity in 50\% of animals; CI, confidence interval; ED50, the dose of drug required to produce the desired end point in 50\% of animals; and PI, protective index (ratio of TD50 to ED50)} \\
\hline
\end{tabular}

```

Figure 2. Showcase of Table-SE.

Visual Table

| 企业类型     | 目的                               | 模式和特点                         | 优势                                                  | 典型企业                                      |
|----------|----------------------------------|-------------------------------|-----------------------------------------------------|-------------------------------------------|
| 云服务提供商   | 以物联网为抓手带动上层应用服务业绩增长              | 目前多以提供底层计算资源、提供应用使能平台为主       | 在互联网领域中积累了丰富的技术、商业、生态优势经验<br>底层IaaS能力突出、共性技术能力提炼    | 阿里巴巴、腾讯云、百度云、亚马逊AWS IoT等                  |
| 通信领域厂商   | 获得流量业务收入、战略布局物联网、把握新增市场机遇        | 多以连接管理、应用使能平台为主要功能服务为主        | 在连接管理平台具有绝对优势、具有全球通用连接能力                            | 电信运营商、通信设备厂商、中国移动ONENet、中国联通物联网平台、华为云IoT等 |
| 软件系统服务商  | 解决内部开发效率的问题、优化产品服务               | 以应用开发平台为主要服务内容为主              | 擅长软件设计、生产、管理、运维等服务、具备丰富的行业软件开发及服务经验                 | 紫光云、广联达筑联等                                |
| 垂直领域传统厂商 | 利用自身对行业的理解与经验、打造垂直平台、实现传统企业的转型升级 | 垂直专业领域的物联网平台                  | 深刻的行业理解和行业技术、对行业有深度应用、拥有行业数据和客户资源                   | 西门子、工业富联、美的M-Smart等企业                     |
| 初创企业     | 看好物联网未来的发展潜力                     | 目前阶段很多初创平台企业多以SaaS解决方案公司的形式存在 | 拥有与选定细分行业相关的软件、硬件经验<br>服务延伸到通用型平台厂商难以触及的细分领域、形成错位竞争 | 涂鸦智能、云智易、机智云、艾拉物联等                        |

| Site-B | Site-E | DEV  | DD   | Model |
|--------|--------|------|------|-------|
| 3-HCY  | 11-DGG | 1.49 | 66.5 | d-1   |
| 3-HCY  | 12-GGS | 1.49 | 66.5 |       |
| 4-CNY  | 1-GGH  | 1.29 | 74.8 |       |
| 4-CNY  | 11-DGG | 1.29 | 74.8 |       |
| 4-CNY  | 12-GGS | 1.29 | 74.8 | d-2   |
| 5-YNT  | 1-GGH  | 1.39 | 70.3 |       |
| 5-YNT  | 11-DGG | 1.39 | 70.3 |       |
| 5-YNT  | 12-GGS | 1.39 | 70.3 |       |
| 5-YNT  | 18-GGC | 1.39 | 76.6 | d-3   |
| 9-NND  | 1-GGH  | 1.85 | 69.2 |       |
| 9-NND  | 12-GGS | 1.85 | 69.2 |       |
| 9-NND  | 18-GGC | 1.85 | 73.9 |       |

Ground Truth: LaTeX

```

\begin{tabular}{|l|l|l|l|l|} \hline
企业类型 & 目的 & 模式和特点 & 优势 & 典型企业 \\ \hline
云服务提供商 & 以物联网为抓手带动上层应用服务业绩增长 & 目前多以提供底层计算资源、提供应用使能平台为主 & 在互联网领域中积累了丰富的技术、商业、生态优势经验 & 阿里巴巴、腾讯云、百度云、亚马逊AWS IoT等 \\ \hline
通信领域厂商 & 获得流量业务收入、战略布局物联网、把握新增市场机遇 & 多以连接管理、应用使能平台为主要功能服务为主 & 在连接管理平台具有绝对优势、具有全球通用连接能力 & 电信运营商、通信设备厂商、中国移动ONENet、中国联通物联网平台、华为云IoT等 \\ \hline
软件系统服务商 & 解决内部开发效率的问题、优化产品服务 & 以应用开发平台为主要服务内容为主 & 擅长软件设计、生产、管理、运维等服务、具备丰富的行业软件开发及服务经验 & 紫光云、广联达筑联等 \\ \hline
垂直领域传统厂商 & 利用自身对行业的理解与经验、打造垂直平台、实现传统企业的转型升级 & 垂直专业领域的物联网平台 & 深刻的行业理解和行业技术、对行业有深度应用、拥有行业数据和客户资源 & 西门子、工业富联、美的M-Smart等企业 \\ \hline
初创企业 & 看好物联网未来的发展潜力 & 目前阶段很多初创平台企业多以SaaS解决方案公司的形式存在 & 拥有与选定细分行业相关的软件、硬件经验 & 涂鸦智能、云智易、机智云、艾拉物联等 \\ \hline
\end{tabular}

```

```

\begin{tabular}{|l|l|l|l|l|} \hline
Site-B & Site-E & DEV & DD & Model \\ \hline
3-HCY & 11-DGG & 1.49 & 66.5 & \\ \hline
3-HCY & 12-GGS & 1.49 & 66.5 & d-1 \\ \hline
4-CNY & 1-GGH & 1.29 & 74.8 & \\ \hline
4-CNY & 11-DGG & 1.29 & 74.8 & \\ \hline
4-CNY & 12-GGS & 1.29 & 74.8 & \\ \hline
5-YNT & 1-GGH & 1.39 & 70.3 & d-2 \\ \hline
5-YNT & 11-DGG & 1.39 & 70.3 & \\ \hline
5-YNT & 12-GGS & 1.39 & 70.3 & \\ \hline
5-YNT & 18-GGC & 1.39 & 76.6 & \\ \hline
9-NND & 1-GGH & 1.85 & 69.2 & d-3 \\ \hline
9-NND & 12-GGS & 1.85 & 69.2 & \\ \hline
9-NND & 18-GGC & 1.85 & 73.9 & \\ \hline
\end{tabular}

```

Figure 3. Showcase of Table-SE.

thumbnail images as input for  $E^g$  without employing the widely-used Dynamic High Resolution (DHR) technique [5, 18]. In the Visual Instruction Tuning stage, DHR is introduced, allowing up to six times more visual tokens. At this stage, we apply the Generalist-Specialist Collaboration Masking (GSCM) mechanism with a masking ratio of 0.3 to constrain  $E^g$ , encouraging the model to leverage domain-specific information from expert models. For train-

able modules, the Domain-General Knowledge Alignment stage updates only the General Projector  $P^g$  and Expert Projector Set  $S^e$ . In subsequent stages, the General Projector  $P^g$ , Expert Projector Set  $S^e$ , and Language Model  $f$  are updated.

|                      |              | Domain-General Knowledge Alignment                   | Visual Instruction Tuning                                                 |                                                                                                   |
|----------------------|--------------|------------------------------------------------------|---------------------------------------------------------------------------|---------------------------------------------------------------------------------------------------|
| Vision               | Resolution   | General Encoder $E^g$                                | 448                                                                       | $448 \times \{\{1,2,3,4,5,6\} \times 1, 1 \times \{2,3,4,5,6\}, 2 \times \{2,3\}, 3 \times 2\}\}$ |
|                      |              | Table Encoder $E^{table}$                            | N/A                                                                       | N/A                                                                                               |
|                      |              | Chart Encoder $E^{chart}$                            | N/A                                                                       | N/A                                                                                               |
|                      |              | Math Encoder $E^{math}$                              | 336                                                                       | 336                                                                                               |
|                      | #Tokens      | General Encoder $E^g$                                | 256                                                                       | Max $256 \times 6$                                                                                |
|                      |              | Table Encoder $E^{table}$                            | 2048                                                                      | 2048                                                                                              |
|                      |              | Chart Encoder $E^{chart}$                            | 2048                                                                      | 2048                                                                                              |
|                      |              | Math Encoder $E^{math}$                              | 576                                                                       | 576                                                                                               |
|                      | Total Tokens |                                                      | $256 + \{0, 2048, 2048, 576\}$                                            | Max $256 \times 6 + \{0, 2048, 2048, 576\}$                                                       |
|                      | Training     | #Samples                                             | 1.1M                                                                      | 2.6M                                                                                              |
| GSCM ratio           |              | N/A                                                  | 0.3                                                                       |                                                                                                   |
| Dynamic High Res [5] |              | False                                                | True                                                                      |                                                                                                   |
| Trainable            |              | General Projector $P^g$ , Expert Projector Set $S^e$ | General Projector $P^g$ , Expert Projector Set $S^e$ , Language Model $f$ |                                                                                                   |
| Batch Size           |              | 256/128                                              | 128                                                                       |                                                                                                   |
| LR                   |              | 4e-5/2e-5                                            | 2e-5/1e-5                                                                 |                                                                                                   |
| Warm Up              |              | 100 steps                                            | 0.03 ratio                                                                |                                                                                                   |
| LR Scheduler         |              | Consine                                              | Consine                                                                   |                                                                                                   |
| Max Length           |              | 4096                                                 | 8192                                                                      |                                                                                                   |
| Weight Decay         |              | 0.01                                                 | 0.01                                                                      |                                                                                                   |
| Epoch                |              | 1                                                    | 1                                                                         |                                                                                                   |

Table 8. Detailed configuration for each training stage of Chimera in multi-modal reasoning scenario. The table outlines the progression of vision parameters, dataset characteristics and training hyperparameters. For elements containing “/”, the left side represents configurations used by the 2B and 4B model, while the right side represents configurations used by the 8B model.

|          |                      |                                                      | Domain-General Knowledge Alignment                                        | Visual Instruction Tuning                                                                         |
|----------|----------------------|------------------------------------------------------|---------------------------------------------------------------------------|---------------------------------------------------------------------------------------------------|
| Vision   | Resolution           | General Encoder $E^g$                                | 448                                                                       | $448 \times \{\{1,2,3,4,5,6\} \times 1, 1 \times \{2,3,4,5,6\}, 2 \times \{2,3\}, 3 \times 2\}\}$ |
|          |                      | Document Encoder $E^{document}$                      | 1024                                                                      | 1024                                                                                              |
|          | #Tokens              | General Encoder $E^g$                                | 256                                                                       | Max $256 \times 6$                                                                                |
|          |                      | Document Encoder $E^{document}$                      | 256                                                                       | 256                                                                                               |
|          | Total Tokens         |                                                      | $256 + 256$                                                               | Max $256 \times 6 + 256$                                                                          |
| Training | #Samples             | 995K                                                 | 275K                                                                      |                                                                                                   |
|          | GSCM ratio           | N/A                                                  | 0.3                                                                       |                                                                                                   |
|          | Dynamic High Res [5] | False                                                | True                                                                      |                                                                                                   |
|          | Trainable            | General Projector $P^g$ , Expert Projector Set $S^e$ | General Projector $P^g$ , Expert Projector Set $S^e$ , Language Model $f$ |                                                                                                   |
|          | Batch Size           | 256                                                  | 128                                                                       |                                                                                                   |
|          | LR                   | 4e-5                                                 | 2e-5                                                                      |                                                                                                   |
|          | Warm Up              | 100 steps                                            | 0.03 ratio                                                                |                                                                                                   |
|          | LR Scheduler         | Consine                                              | Consine                                                                   |                                                                                                   |
|          | Max Length           | 4096                                                 | 8192                                                                      |                                                                                                   |
|          | Weight Decay         | 0.01                                                 | 0.01                                                                      |                                                                                                   |
|          | Epoch                | 1                                                    | 1                                                                         |                                                                                                   |

Table 9. Detailed configuration for each training stage of Chimera in visual content extraction scenario. The table outlines the progression of vision parameters, dataset characteristics and training hyperparameters.

## 10. Visualization of Chimera on Visual Content Extraction

### 10.1. Table Format Transformation

We provide the rendered table of the output results of Chimera-8B to show its table format transformation performance. As shown in Fig. 4, Fig. 5 and Fig. 6, Chimera excels in extracting and formatting table content from both Arxiv-style and more diverse table layouts with high accuracy.

### 10.2. Chart Structural Extraction

We provide the rendered table of the output results of Chimera-8B to show its chart structural extraction performance. As shown in Fig. 7, Fig. 8 and Fig. ??, Chimera can identify and extract information from various types of charts, such as pie charts, line graphs, bar charts, etc., and output this information in a structured format accurately.

# Input: Visual Table

| 资产负债表    |         |         |         |         |         |
|----------|---------|---------|---------|---------|---------|
|          | 2020    | 2021    | 2022E   | 2023E   | 2024E   |
| 货币资金     | 703.3   | 604.1   | 2,111.4 | 2,582.9 | 2,817.4 |
| 交易性金融资产  | -       | -       | -       | -       | -       |
| 应收账款     | 1,066.7 | 1,307.4 | 1,507.8 | 1,720.8 | 2,801.0 |
| 应收票据     | 85.6    | 163.1   | 72.2    | 157.3   | 147.1   |
| 预付账款     | 56.4    | 54.9    | 89.0    | 86.7    | 116.8   |
| 存货       | 779.0   | 648.3   | 1,009.8 | 1,053.6 | 1,519.6 |
| 其他流动资产   | 670.3   | 448.3   | 414.6   | 511.1   | 274.8   |
| 可供出售金融资产 | -       | -       | -       | -       | -       |
| 持有至到期投资  | -       | -       | -       | -       | -       |
| 长期股权投资   | 60.7    | 36.9    | 36.9    | 36.9    | 36.9    |
| 投资性房地产   | 5.0     | 13.2    | 13.2    | 13.2    | 13.2    |
| 固定资产     | 445.5   | 502.8   | 459.0   | 415.2   | 371.5   |
| 在建工程     | 24.4    | 29.0    | 29.0    | 29.0    | 29.0    |
| 无形资产     | 107.8   | 98.8    | 86.7    | 74.6    | 62.5    |
| 其他非流动资产  | 1,274.9 | 1,705.5 | 1,498.7 | 1,490.2 | 1,290.6 |
| 资产总额     | 5,279.6 | 5,612.2 | 7,328.3 | 8,171.5 | 9,480.2 |
| 短期债务     | 736.6   | 809.5   | 1,460.2 | 2,054.8 | 1,482.0 |
| 应付账款     | 1,554.8 | 1,651.2 | 2,027.4 | 1,942.5 | 2,822.0 |
| 应付票据     | 109.3   | 124.5   | 23.3    | 153.6   | 60.8    |
| 其他流动负债   | 516.5   | 613.7   | 581.4   | 580.4   | 584.1   |
| 长期借款     | 240.4   | 60.1    | 422.8   | 189.0   | -       |
| 其他非流动负债  | 53.4    | 111.7   | 65.8    | 76.9    | 84.8    |
| 负债总额     | 3,210.9 | 3,370.6 | 4,580.8 | 4,997.2 | 5,033.8 |
| 少数股东权益   | 208.0   | 111.5   | 118.1   | 129.1   | 142.4   |
| 股本       | 774.8   | 772.8   | 772.8   | 772.8   | 772.8   |
| 留存收益     | 1,290.0 | 1,662.1 | 2,059.7 | 2,557.2 | 3,134.9 |
| 股东权益     | 2,068.6 | 2,241.6 | 2,747.6 | 3,174.3 | 4,446.4 |

| 主要财务指标    |       |       |       |       |
|-----------|-------|-------|-------|-------|
|           | 2021A | 2022E | 2023E | 2024E |
| 营业收入      | 19515 | 23852 | 27760 | 31884 |
| 收入同比 (%)  | 45.1% | 22.2% | 16.4% | 14.9% |
| 归属母公司净利润  | 1150  | 1339  | 1671  | 2002  |
| 净利润同比 (%) | 43.9% | 16.4% | 24.8% | 19.8% |
| 毛利率 (%)   | 12.6% | 12.7% | 13.6% | 13.9% |
| ROE (%)   | 15.8% | 15.9% | 17.0% | 17.4% |
| 每股收益 (元)  | 2.19  | 2.52  | 3.15  | 3.77  |
| P/E       | 24.45 | 14.59 | 11.69 | 9.76  |
| P/B       | 3.91  | 2.33  | 1.99  | 1.70  |
| EV/EBITDA | 15.29 | 6.19  | 4.85  | 3.80  |

|                | RPCB多层板 | 软板+模组  | HDI    | IC载板   |
|----------------|---------|--------|--------|--------|
| 2022(E)        | 387.21  | 138.42 | 117.63 | 174.15 |
| 2023(F)        | 373.40  | 134.27 | 115.28 | 160.73 |
| 2024(F)        | 381.79  | 141.31 | 122.25 | 174.41 |
| 2025(F)        | 419.39  | 148.72 | 129.65 | 189.26 |
| 2026(F)        | 444.30  | 156.52 | 137.49 | 205.38 |
| 2027(F)        | 450.48  | 164.73 | 145.81 | 222.86 |
| 2022-2027 CAGR | 3.1%    | 3.5%   | 4.4%   | 5.1%   |

# Output: LaTeX

| 资产负债表    |         |         |         |         |         |
|----------|---------|---------|---------|---------|---------|
|          | 2020    | 2021    | 2022E   | 2023E   | 2024E   |
| 货币资金     | 703.3   | 604.1   | 2,111.4 | 2,582.9 | 2,817.4 |
| 交易性金融资产  | -       | -       | -       | -       | -       |
| 应收账款     | 1,066.7 | 1,307.4 | 1,507.8 | 1,720.8 | 2,801.0 |
| 应收票据     | 85.6    | 163.1   | 72.2    | 157.3   | 147.1   |
| 预付账款     | 56.4    | 54.9    | 89.0    | 86.7    | 116.8   |
| 存货       | 779.0   | 648.3   | 1,009.8 | 1,053.6 | 1,519.6 |
| 其他流动资产   | 670.3   | 448.3   | 414.6   | 511.1   | 274.8   |
| 可供出售金融资产 | -       | -       | -       | -       | -       |
| 持有至到期投资  | -       | -       | -       | -       | -       |
| 长期股权投资   | 60.7    | 36.9    | 36.9    | 36.9    | 36.9    |
| 投资性房地产   | 5.0     | 13.2    | 13.2    | 13.2    | 13.2    |
| 固定资产     | 445.5   | 502.8   | 459.0   | 415.2   | 371.5   |
| 在建工程     | 24.4    | 29.0    | 29.0    | 29.0    | 29.0    |
| 无形资产     | 107.8   | 98.8    | 86.7    | 74.6    | 62.5    |
| 其他非流动资产  | 1,274.9 | 1,705.5 | 1,498.7 | 1,490.2 | 1,290.6 |
| 资产总额     | 5,279.6 | 5,612.2 | 7,328.3 | 8,171.5 | 9,480.2 |
| 短期负债     | 736.6   | 809.5   | 1,460.2 | 2,054.8 | 1,482.0 |
| 应付账款     | 1,554.8 | 1,651.2 | 2,027.4 | 1,942.5 | 2,822.0 |
| 应付票据     | 109.3   | 124.5   | 23.3    | 153.6   | 60.8    |
| 其他流动负债   | 516.5   | 613.7   | 581.4   | 580.4   | 584.1   |
| 长期借款     | 240.4   | 60.1    | 422.8   | 189.0   | -       |
| 其他非流动负债  | 53.4    | 111.7   | 65.8    | 76.9    | 84.8    |
| 负债总额     | 3,210.9 | 3,370.6 | 4,580.8 | 4,997.2 | 5,033.8 |
| 少数股东权益   | 208.0   | 111.5   | 118.1   | 129.1   | 142.4   |
| 股本       | 774.8   | 772.8   | 772.8   | 772.8   | 772.8   |
| 留存收益     | 1,290.0 | 1,662.1 | 2,059.7 | 2,557.2 | 3,134.9 |
| 股东权益     | 2,068.6 | 2,241.6 | 2,747.6 | 3,174.3 | 4,446.4 |

| 主要财务指标      |       |       |       |       |
|-------------|-------|-------|-------|-------|
|             | 2021A | 2022E | 2023E | 2024E |
| 营业收入        | 19515 | 23852 | 27760 | 31884 |
| 收入同比增长 (%)  | 45.1% | 22.2% | 16.4% | 14.9% |
| 归属于母公司净利润   | 1150  | 1339  | 1671  | 2002  |
| 净利润同比增长 (%) | 43.9% | 16.4% | 24.8% | 19.8% |
| 毛利率 (%)     | 12.6% | 12.7% | 13.6% | 13.9% |
| ROE (%)     | 15.8% | 15.9% | 17.0% | 17.4% |
| 每股收益 (元)    | 2.19  | 2.52  | 3.15  | 3.77  |
| P/E         | 24.45 | 14.59 | 11.69 | 9.76  |
| P/B         | 3.91  | 2.33  | 1.99  | 1.70  |
| EV/EBITDA   | 15.29 | 6.19  | 4.85  | 3.80  |

|                | RPCB 多层板 | 软板 + 模组 | HDI    | IC 载板  |
|----------------|----------|---------|--------|--------|
| 2022(E)        | 387.21   | 138.42  | 117.63 | 174.15 |
| 2023(F)        | 373.40   | 134.27  | 115.28 | 160.73 |
| 2024(F)        | 381.79   | 141.31  | 122.25 | 174.41 |
| 2025(F)        | 419.39   | 148.72  | 129.65 | 189.26 |
| 2026(F)        | 444.30   | 156.52  | 137.49 | 205.38 |
| 2027(F)        | 450.48   | 164.73  | 145.81 | 222.86 |
| 2022-2027 CAGR | 3.1%     | 3.5%    | 4.4%   | 5.1%   |

Figure 4. Output of Chimera-8B on Table Format Transformation.

## 10.3. Document Context Extraction

We provide the rendered page of the output results of Chimera to show its document content extraction performance. As shown in Fig. 10, Fig. 11, Fig. 12 and Fig. 13, Chimera demonstrates exceptional content extraction ca-

pabilities on both single-column and double-column documents, effectively extracting structured information end-to-end from text-dense visual inputs.

# Input: Visual Table

| Star               | Sp. type           | P <sub>rot</sub><br>(days) | P <sub>cyc</sub> (range)<br>(years)                              | lt <sup>c</sup> | P <sub>cyc</sub> , Balinuas et al.<br>(years) |
|--------------------|--------------------|----------------------------|------------------------------------------------------------------|-----------------|-----------------------------------------------|
| simple cycles      |                    |                            |                                                                  |                 |                                               |
| HD 3651            | K0V <sup>a</sup>   | 44 <sup>b</sup>            | 11.6(9.57–13.7)-lt                                               | yes             | 13.8±0.4                                      |
| HD 4628            | K2.5V <sup>a</sup> | 41.6                       | 8.94(8.30–9.5)                                                   | no              | 8.37±0.08                                     |
| HD 10476           | K1V <sup>a</sup>   | 33.7                       | 9.8(9.01–9.85)                                                   | no              | 9.6±0.1                                       |
| HD 16160           | K3V <sup>a</sup>   | 57                         | 12.1                                                             | no              | 13.2±0.2                                      |
| HD 26965           | K1V <sup>a</sup>   | 43 <sup>b</sup>            | 10.0(9.57–10.5)                                                  | no              | 10.1±0.1                                      |
| HD 32147           | K3+V <sup>a</sup>  | 39.3                       | 10.6(9.85–11.3), lt                                              | yes             | 11.1±0.2                                      |
| HD 81809           | G5V <sup>a</sup>   | 39.3                       | 8.69(8.10–9.28)                                                  | no              | 8.17±0.08                                     |
| HD 103995          | K1V <sup>a</sup>   | 36.5                       | 6.95(6.9–7.0), lt                                                | yes             | 7.30±0.08                                     |
| HD 160346          | K2.5V <sup>a</sup> | 35.3                       | 7.35(7.2–7.5), lt                                                | yes             | 7.00±0.08                                     |
| HD 166620          | K2V <sup>c</sup>   | 41.5                       | 13.6(9.6–17.6)                                                   | no              | 15.8±0.3                                      |
| HD 201091          | K5V                | 37.1                       | 6.95(6.7–7.2), lt                                                | yes             | 7.3±0.1                                       |
| HD 219834B         | K2V                | 34.0                       | 9.29(9.01–9.57)                                                  | no              | 10.0±0.2                                      |
| Sum                | G2V                | 27.275                     | 11(9–14), 3.65(3.3–4.0) <sup>d</sup>                             | yes             |                                               |
| complicated cycles |                    |                            |                                                                  |                 |                                               |
| HD 1835            | G2V <sup>a</sup>   | 7.84                       | 7.6(7.3–7.9), 2.4(2.50–2.28), 3.97(4.85–3.09), lt                | yes             | 9.1±0.3                                       |
| HD 20630           | G5V                | 9.08                       | 5.32(5.36–5.27)                                                  | no              | 5.6±0.1                                       |
| HD 76151           | G3V <sup>a</sup>   | 15.2                       | 5.32(6.07–4.56), lt                                              | yes             | 2.52±0.02                                     |
| HD 78366           | G0V                | 9.7                        | 13.45(12.6–14.3)-lt, 4.0(3.85–4.15)                              | yes             | 12.2±0.4, 5.9±0.1                             |
| HD 95735           | M2V                | 54                         | 3.90(3.75–4.04), 12.7(10.3–15.0)-lt                              | yes             |                                               |
| HD 100180          | F9.5V <sup>a</sup> | 14.6                       | 13.2(16.6–9.85), 3.63                                            | no              | 3.56±0.04, 12.9±0.5                           |
| HD 114710          | G0V                | 12.9                       | 16.6(17.6–13.7–18.6), 7.7(7.2–8.2), 5.25(5.1–5.4)                | no              | 16.6±0.6, 9.6±0.3                             |
| HD 115404          | K2.5V <sup>a</sup> | 18.8                       | 10.8(9.57–12.1), 5.08(5.83–4.33), 3.4(3.96–2.84) lt              | yes             | 12.4±0.4                                      |
| HD 131156A         | G8V                | 6.25                       | 3.7(3.6–3.8), 12, lt                                             | yes             |                                               |
| HD 131156B         | K4V                | 11.05                      | 4.2(4.64–3.76), 2.28, lt                                         | yes             |                                               |
| HD 149661          | K0V <sup>a</sup>   | 21.3                       | 4.0, 6.2(5.6–6.8), 12.25(11.3–13.2)-lt                           | yes             | 17.4±0.7, 4.00±0.04                           |
| HD 152391          | G8+V <sup>a</sup>  | 11.4                       | 9.9(12.6–7.17), 2.8(2.5–3.1)                                     | no              | 10.9±0.2                                      |
| HD 156026          | K5V                | 29.2                       | 4.33(3.95–4.71), 8.1, lt(≈20)                                    | yes             | 21.0±0.9                                      |
| HD 165341A         | K0V <sup>a</sup>   | 18.9                       | 11.4(9–13.8), 5.17, lt                                           | yes             | 5.1±0.1                                       |
| HD 165341B         | K6V                | –                          | –                                                                | yes             | Var                                           |
| HD 190406          | G0V <sup>a</sup>   | 15.5                       | 15.8(15.0–17.6)-lt, 8.35(7.69–9.01), 4.65(4.44–4.86), 2.33, 3.01 | yes             | 2.60±0.02, 16.9±0.8                           |
| HD 201092          | K7V                | 34.1                       | 13.4(10.1–16.6)-lt, 4.45(4.71–4.18), (2.07:)                     | yes             | 11.7±0.4                                      |
|                    |                    |                            |                                                                  |                 |                                               |
|                    |                    |                            |                                                                  |                 |                                               |
|                    |                    |                            |                                                                  |                 |                                               |
|                    |                    |                            |                                                                  |                 |                                               |
|                    |                    |                            |                                                                  |                 |                                               |
|                    |                    |                            |                                                                  |                 |                                               |
|                    |                    |                            |                                                                  |                 |                                               |
|                    |                    |                            |                                                                  |                 |                                               |
|                    |                    |                            |                                                                  |                 |                                               |
|                    |                    |                            |                                                                  |                 |                                               |
|                    |                    |                            |                                                                  |                 |                                               |
|                    |                    |                            |                                                                  |                 |                                               |
|                    |                    |                            |                                                                  |                 |                                               |
|                    |                    |                            |                                                                  |                 |                                               |
|                    |                    |                            |                                                                  |                 |                                               |
|                    |                    |                            |                                                                  |                 |                                               |
|                    |                    |                            |                                                                  |                 |                                               |
|                    |                    |                            |                                                                  |                 |                                               |
|                    |                    |                            |                                                                  |                 |                                               |
|                    |                    |                            |                                                                  |                 |                                               |
|                    |                    |                            |                                                                  |                 |                                               |
|                    |                    |                            |                                                                  |                 |                                               |
|                    |                    |                            |                                                                  |                 |                                               |
|                    |                    |                            |                                                                  |                 |                                               |
|                    |                    |                            |                                                                  |                 |                                               |
|                    |                    |                            |                                                                  |                 |                                               |
|                    |                    |                            |                                                                  |                 |                                               |
|                    |                    |                            |                                                                  |                 |                                               |
|                    |                    |                            |                                                                  |                 |                                               |
|                    |                    |                            |                                                                  |                 |                                               |
|                    |                    |                            |                                                                  |                 |                                               |
|                    |                    |                            |                                                                  |                 |                                               |
|                    |                    |                            |                                                                  |                 |                                               |
|                    |                    |                            |                                                                  |                 |                                               |
|                    |                    |                            |                                                                  |                 |                                               |
|                    |                    |                            |                                                                  |                 |                                               |
|                    |                    |                            |                                                                  |                 |                                               |
|                    |                    |                            |                                                                  |                 |                                               |
|                    |                    |                            |                                                                  |                 |                                               |
|                    |                    |                            |                                                                  |                 |                                               |
|                    |                    |                            |                                                                  |                 |                                               |
|                    |                    |                            |                                                                  |                 |                                               |
|                    |                    |                            |                                                                  |                 |                                               |
|                    |                    |                            |                                                                  |                 |                                               |
|                    |                    |                            |                                                                  |                 |                                               |
|                    |                    |                            |                                                                  |                 |                                               |
|                    |                    |                            |                                                                  |                 |                                               |
|                    |                    |                            |                                                                  |                 |                                               |
|                    |                    |                            |                                                                  |                 |                                               |
|                    |                    |                            |                                                                  |                 |                                               |
|                    |                    |                            |                                                                  |                 |                                               |
|                    |                    |                            |                                                                  |                 |                                               |
|                    |                    |                            |                                                                  |                 |                                               |
|                    |                    |                            |                                                                  |                 |                                               |
|                    |                    |                            |                                                                  |                 |                                               |
|                    |                    |                            |                                                                  |                 |                                               |
|                    |                    |                            |                                                                  |                 |                                               |
|                    |                    |                            |                                                                  |                 |                                               |
|                    |                    |                            |                                                                  |                 |                                               |
|                    |                    |                            |                                                                  |                 |                                               |
|                    |                    |                            |                                                                  |                 |                                               |
|                    |                    |                            |                                                                  |                 |                                               |
|                    |                    |                            |                                                                  |                 |                                               |
|                    |                    |                            |                                                                  |                 |                                               |
|                    |                    |                            |                                                                  |                 |                                               |
|                    |                    |                            |                                                                  |                 |                                               |
|                    |                    |                            |                                                                  |                 |                                               |
|                    |                    |                            |                                                                  |                 |                                               |
|                    |                    |                            |                                                                  |                 |                                               |
|                    |                    |                            |                                                                  |                 |                                               |
|                    |                    |                            |                                                                  |                 |                                               |
|                    |                    |                            |                                                                  |                 |                                               |
|                    |                    |                            |                                                                  |                 |                                               |
|                    |                    |                            |                                                                  |                 |                                               |
|                    |                    |                            |                                                                  |                 |                                               |
|                    |                    |                            |                                                                  |                 |                                               |
|                    |                    |                            |                                                                  |                 |                                               |
|                    |                    |                            |                                                                  |                 |                                               |
|                    |                    |                            |                                                                  |                 |                                               |
|                    |                    |                            |                                                                  |                 |                                               |
|                    |                    |                            |                                                                  |                 |                                               |
|                    |                    |                            |                                                                  |                 |                                               |
|                    |                    |                            |                                                                  |                 |                                               |
|                    |                    |                            |                                                                  |                 |                                               |
|                    |                    |                            |                                                                  |                 |                                               |
|                    |                    |                            |                                                                  |                 |                                               |
|                    |                    |                            |                                                                  |                 |                                               |
|                    |                    |                            |                                                                  |                 |                                               |
|                    |                    |                            |                                                                  |                 |                                               |
|                    |                    |                            |                                                                  |                 |                                               |
|                    |                    |                            |                                                                  |                 |                                               |
|                    |                    |                            |                                                                  |                 |                                               |
|                    |                    |                            |                                                                  |                 |                                               |
|                    |                    |                            |                                                                  |                 |                                               |
|                    |                    |                            |                                                                  |                 |                                               |
|                    |                    |                            |                                                                  |                 |                                               |
|                    |                    |                            |                                                                  |                 |                                               |
|                    |                    |                            |                                                                  |                 |                                               |
|                    |                    |                            |                                                                  |                 |                                               |
|                    |                    |                            |                                                                  |                 |                                               |
|                    |                    |                            |                                                                  |                 |                                               |
|                    |                    |                            |                                                                  |                 |                                               |
|                    |                    |                            |                                                                  |                 |                                               |
|                    |                    |                            |                                                                  |                 |                                               |
|                    |                    |                            |                                                                  |                 |                                               |
|                    |                    |                            |                                                                  |                 |                                               |
|                    |                    |                            |                                                                  |                 |                                               |
|                    |                    |                            |                                                                  |                 |                                               |
|                    |                    |                            |                                                                  |                 |                                               |
|                    |                    |                            |                                                                  |                 |                                               |
|                    |                    |                            |                                                                  |                 |                                               |
|                    |                    |                            |                                                                  |                 |                                               |
|                    |                    |                            |                                                                  |                 |                                               |
|                    |                    |                            |                                                                  |                 |                                               |
|                    |                    |                            |                                                                  |                 |                                               |
|                    |                    |                            |                                                                  |                 |                                               |
|                    |                    |                            |                                                                  |                 |                                               |
|                    |                    |                            |                                                                  |                 |                                               |
|                    |                    |                            |                                                                  |                 |                                               |
|                    |                    |                            |                                                                  |                 |                                               |
|                    |                    |                            |                                                                  |                 |                                               |
|                    |                    |                            |                                                                  |                 |                                               |
|                    |                    |                            |                                                                  |                 |                                               |
|                    |                    |                            |                                                                  |                 |                                               |
|                    |                    |                            |                                                                  |                 |                                               |
|                    |                    |                            |                                                                  |                 |                                               |
|                    |                    |                            |                                                                  |                 |                                               |
|                    |                    |                            |                                                                  |                 |                                               |
|                    |                    |                            |                                                                  |                 |                                               |
|                    |                    |                            |                                                                  |                 |                                               |
|                    |                    |                            |                                                                  |                 |                                               |
|                    |                    |                            |                                                                  |                 |                                               |
|                    |                    |                            |                                                                  |                 |                                               |
|                    |                    |                            |                                                                  |                 |                                               |
|                    |                    |                            |                                                                  |                 |                                               |
|                    |                    |                            |                                                                  |                 |                                               |
|                    |                    |                            |                                                                  |                 |                                               |
|                    |                    |                            |                                                                  |                 |                                               |
|                    |                    |                            |                                                                  |                 |                                               |
|                    |                    |                            |                                                                  |                 |                                               |
|                    |                    |                            |                                                                  |                 |                                               |
|                    |                    |                            |                                                                  |                 |                                               |
|                    |                    |                            |                                                                  |                 |                                               |
|                    |                    |                            |                                                                  |                 |                                               |
|                    |                    |                            |                                                                  |                 |                                               |
|                    |                    |                            |                                                                  |                 |                                               |
|                    |                    |                            |                                                                  |                 |                                               |
|                    |                    |                            |                                                                  |                 |                                               |
|                    |                    |                            |                                                                  |                 |                                               |
|                    |                    |                            |                                                                  |                 |                                               |
|                    |                    |                            |                                                                  |                 |                                               |
|                    |                    |                            |                                                                  |                 |                                               |
|                    |                    |                            |                                                                  |                 |                                               |
|                    |                    |                            |                                                                  |                 |                                               |
|                    |                    |                            |                                                                  |                 |                                               |
|                    |                    |                            |                                                                  |                 |                                               |
|                    |                    |                            |                                                                  |                 |                                               |
|                    |                    |                            |                                                                  |                 |                                               |
|                    |                    |                            |                                                                  |                 |                                               |
|                    |                    |                            |                                                                  |                 |                                               |
|                    |                    |                            |                                                                  |                 |                                               |
|                    |                    |                            |                                                                  |                 |                                               |
|                    |                    |                            |                                                                  |                 |                                               |
|                    |                    |                            |                                                                  |                 |                                               |
|                    |                    |                            |                                                                  |                 |                                               |
|                    |                    |                            |                                                                  |                 |                                               |
|                    |                    |                            |                                                                  |                 |                                               |
|                    |                    |                            |                                                                  |                 |                                               |
|                    |                    |                            |                                                                  |                 |                                               |
|                    |                    |                            |                                                                  |                 |                                               |
|                    |                    |                            |                                                                  |                 |                                               |
|                    |                    |                            |                                                                  |                 |                                               |
|                    |                    |                            |                                                                  |                 |                                               |
|                    |                    |                            |                                                                  |                 |                                               |
|                    |                    |                            |                                                                  |                 |                                               |
|                    |                    |                            |                                                                  |                 |                                               |
|                    |                    |                            |                                                                  |                 |                                               |
|                    |                    |                            |                                                                  |                 |                                               |
|                    |                    |                            |                                                                  |                 |                                               |
|                    |                    |                            |                                                                  |                 |                                               |
|                    |                    |                            |                                                                  |                 |                                               |
|                    |                    |                            |                                                                  |                 |                                               |
|                    |                    |                            |                                                                  |                 |                                               |
|                    |                    |                            |                                                                  |                 |                                               |
|                    |                    |                            |                                                                  |                 |                                               |
|                    |                    |                            |                                                                  |                 |                                               |
|                    |                    |                            |                                                                  |                 |                                               |
|                    |                    |                            |                                                                  |                 |                                               |
|                    |                    |                            |                                                                  |                 |                                               |
|                    |                    |                            |                                                                  |                 |                                               |
|                    |                    |                            |                                                                  |                 |                                               |
|                    |                    |                            |                                                                  |                 |                                               |
|                    |                    |                            |                                                                  |                 |                                               |
|                    |                    |                            |                                                                  |                 |                                               |
|                    |                    |                            |                                                                  |                 |                                               |
|                    |                    |                            |                                                                  |                 |                                               |
|                    |                    |                            |                                                                  |                 |                                               |
|                    |                    |                            |                                                                  |                 |                                               |
|                    |                    |                            |                                                                  |                 |                                               |
|                    |                    |                            |                                                                  |                 |                                               |
|                    |                    |                            |                                                                  |                 |                                               |
|                    |                    |                            |                                                                  |                 |                                               |
|                    |                    |                            |                                                                  |                 |                                               |
|                    |                    |                            |                                                                  |                 |                                               |
|                    |                    |                            |                                                                  |                 |                                               |
|                    |                    |                            |                                                                  |                 |                                               |
|                    |                    |                            |                                                                  |                 |                                               |
|                    |                    |                            |                                                                  |                 |                                               |
|                    |                    |                            |                                                                  |                 |                                               |
|                    |                    |                            |                                                                  |                 |                                               |
|                    |                    |                            |                                                                  |                 |                                               |
|                    |                    |                            |                                                                  |                 |                                               |
|                    |                    |                            |                                                                  |                 |                                               |
|                    |                    |                            |                                                                  |                 |                                               |
|                    |                    |                            |                                                                  |                 |                                               |
|                    |                    |                            |                                                                  |                 |                                               |
|                    |                    |                            |                                                                  |                 |                                               |
|                    |                    |                            |                                                                  |                 |                                               |
|                    |                    |                            |                                                                  |                 |                                               |
|                    |                    |                            |                                                                  |                 |                                               |
|                    |                    |                            |                                                                  |                 |                                               |
|                    |                    |                            |                                                                  |                 |                                               |
|                    |                    |                            |                                                                  |                 |                                               |
|                    |                    |                            |                                                                  |                 |                                               |
|                    |                    |                            |                                                                  |                 |                                               |
|                    |                    |                            |                                                                  |                 |                                               |
|                    |                    |                            |                                                                  |                 |                                               |
|                    |                    |                            |                                                                  |                 |                                               |
|                    |                    |                            |                                                                  |                 |                                               |
|                    |                    |                            |                                                                  |                 |                                               |
|                    |                    |                            |                                                                  |                 |                                               |
|                    |                    |                            |                                                                  |                 |                                               |
|                    |                    |                            |                                                                  |                 |                                               |
|                    |                    |                            |                                                                  |                 |                                               |
|                    |                    |                            |                                                                  |                 |                                               |
|                    |                    |                            |                                                                  |                 |                                               |
|                    |                    |                            |                                                                  |                 |                                               |
|                    |                    |                            |                                                                  |                 |                                               |
|                    |                    |                            |                                                                  |                 |                                               |
|                    |                    |                            |                                                                  |                 |                                               |
|                    |                    |                            |                                                                  |                 |                                               |
|                    |                    |                            |                                                                  |                 |                                               |
|                    |                    |                            |                                                                  |                 |                                               |
|                    |                    |                            |                                                                  |                 |                                               |
|                    |                    |                            |                                                                  |                 |                                               |
|                    |                    |                            |                                                                  |                 |                                               |
|                    |                    |                            |                                                                  |                 |                                               |
|                    |                    |                            |                                                                  |                 |                                               |
|                    |                    |                            |                                                                  |                 |                                               |
|                    |                    |                            |                                                                  |                 |                                               |
|                    |                    |                            |                                                                  |                 |                                               |
|                    |                    |                            |                                                                  |                 |                                               |
|                    |                    |                            |                                                                  |                 |                                               |
|                    |                    |                            |                                                                  |                 |                                               |
|                    |                    |                            |                                                                  |                 |                                               |
|                    |                    |                            |                                                                  |                 |                                               |
|                    |                    |                            |                                                                  |                 |                                               |
|                    |                    |                            |                                                                  |                 |                                               |
|                    |                    |                            |                                                                  |                 |                                               |
|                    |                    |                            |                                                                  |                 |                                               |
|                    |                    |                            |                                                                  |                 |                                               |
|                    |                    |                            |                                                                  |                 |                                               |
|                    |                    |                            |                                                                  |                 |                                               |
|                    |                    |                            |                                                                  |                 |                                               |
|                    |                    |                            |                                                                  |                 |                                               |
|                    |                    |                            |                                                                  |                 |                                               |
|                    |                    |                            |                                                                  |                 |                                               |
|                    |                    |                            |                                                                  |                 |                                               |
|                    |                    |                            |                                                                  |                 |                                               |
|                    |                    |                            |                                                                  |                 |                                               |
|                    |                    |                            |                                                                  |                 |                                               |
|                    |                    |                            |                                                                  |                 |                                               |
|                    |                    |                            |                                                                  |                 |                                               |
|                    |                    |                            |                                                                  |                 |                                               |
|                    |                    |                            |                                                                  |                 |                                               |
|                    |                    |                            |                                                                  |                 |                                               |
|                    |                    |                            |                                                                  |                 |                                               |
|                    |                    |                            |                                                                  |                 |                                               |
|                    |                    |                            |                                                                  |                 |                                               |
|                    |                    |                            |                                                                  |                 |                                               |
|                    |                    |                            |                                                                  |                 |                                               |
|                    |                    |                            |                                                                  |                 |                                               |
|                    |                    |                            |                                                                  |                 |                                               |
|                    |                    |                            |                                                                  |                 |                                               |
|                    |                    |                            |                                                                  |                 |                                               |
|                    |                    |                            |                                                                  |                 |                                               |
|                    |                    |                            |                                                                  |                 |                                               |
|                    |                    |                            |                                                                  |                 |                                               |
|                    |                    |                            |                                                                  |                 |                                               |
|                    |                    |                            |                                                                  |                 |                                               |
|                    |                    |                            |                                                                  |                 |                                               |
|                    |                    |                            |                                                                  |                 |                                               |
|                    |                    |                            |                                                                  |                 |                                               |
|                    |                    |                            |                                                                  |                 |                                               |
|                    |                    |                            |                                                                  |                 |                                               |
|                    |                    |                            |                                                                  |                 |                                               |
|                    |                    |                            |                                                                  |                 |                                               |
|                    |                    |                            |                                                                  |                 |                                               |
|                    |                    |                            |                                                                  |                 |                                               |
|                    |                    |                            |                                                                  |                 |                                               |
|                    |                    |                            |                                                                  |                 |                                               |
|                    |                    |                            |                                                                  |                 |                                               |
|                    |                    |                            |                                                                  |                 |                                               |
|                    |                    |                            |                                                                  |                 |                                               |
|                    |                    |                            |                                                                  |                 |                                               |
|                    |                    |                            |                                                                  |                 |                                               |
|                    |                    |                            |                                                                  |                 |                                               |
|                    |                    |                            |                                                                  |                 |                                               |
|                    |                    |                            |                                                                  |                 |                                               |
|                    |                    |                            |                                                                  |                 |                                               |
|                    |                    |                            |                                                                  |                 |                                               |
|                    |                    |                            |                                                                  |                 |                                               |
|                    |                    |                            |                                                                  |                 |                                               |
|                    |                    |                            |                                                                  |                 |                                               |
|                    |                    |                            |                                                                  |                 |                                               |
|                    |                    |                            |                                                                  |                 |                                               |
|                    |                    |                            |                                                                  |                 |                                               |
|                    |                    |                            |                                                                  |                 |                                               |
|                    |                    |                            |                                                                  |                 |                                               |
|                    |                    |                            |                                                                  |                 |                                               |
|                    |                    |                            |                                                                  |                 |                                               |
|                    |                    |                            |                                                                  |                 |                                               |
|                    |                    |                            |                                                                  |                 |                                               |
|                    |                    |                            |                                                                  |                 |                                               |
|                    |                    |                            |                                                                  |                 |                                               |
|                    |                    |                            |                                                                  |                 |                                               |
|                    |                    |                            |                                                                  |                 |                                               |
|                    |                    |                            |                                                                  |                 |                                               |
|                    |                    |                            |                                                                  |                 |                                               |
|                    |                    |                            |                                                                  |                 |                                               |
|                    |                    |                            |                                                                  |                 |                                               |
|                    |                    |                            |                                                                  |                 |                                               |
|                    |                    |                            |                                                                  |                 |                                               |
|                    |                    |                            |                                                                  |                 |                                               |
|                    |                    |                            |                                                                  |                 |                                               |
|                    |                    |                            |                                                                  |                 |                                               |
|                    |                    |                            |                                                                  |                 |                                               |
|                    |                    |                            |                                                                  |                 |                                               |
|                    |                    |                            |                                                                  |                 |                                               |
|                    |                    |                            |                                                                  |                 |                                               |
|                    |                    |                            |                                                                  |                 |                                               |
|                    |                    |                            |                                                                  |                 |                                               |
|                    |                    |                            |                                                                  |                 |                                               |
|                    |                    |                            |                                                                  |                 |                                               |
|                    |                    |                            |                                                                  |                 |                                               |
|                    |                    |                            |                                                                  |                 |                                               |
|                    |                    |                            |                                                                  |                 |                                               |
|                    |                    |                            |                                                                  |                 |                                               |
|                    |                    |                            |                                                                  |                 |                                               |
|                    |                    |                            |                                                                  |                 |                                               |
|                    |                    |                            |                                                                  |                 |                                               |
|                    |                    |                            |                                                                  |                 |                                               |
|                    |                    |                            |                                                                  |                 |                                               |
|                    |                    |                            |                                                                  |                 |                                               |
|                    |                    |                            |                                                                  |                 |                                               |
|                    |                    |                            |                                                                  |                 |                                               |
|                    |                    |                            |                                                                  |                 |                                               |
|                    |                    |                            |                                                                  |                 |                                               |
|                    |                    |                            |                                                                  |                 |                                               |
|                    |                    |                            |                                                                  |                 |                                               |
|                    |                    |                            |                                                                  |                 |                                               |
|                    |                    |                            |                                                                  |                 |                                               |
|                    |                    |                            |                                                                  |                 |                                               |
|                    |                    |                            |                                                                  |                 |                                               |
|                    |                    |                            |                                                                  |                 |                                               |
|                    |                    |                            |                                                                  |                 |                                               |
|                    |                    |                            |                                                                  |                 |                                               |
|                    |                    |                            |                                                                  |                 |                                               |
|                    |                    |                            |                                                                  |                 |                                               |
|                    |                    |                            |                                                                  |                 |                                               |
|                    |                    |                            |                                                                  |                 |                                               |
|                    |                    |                            |                                                                  |                 |                                               |
|                    |                    |                            |                                                                  |                 |                                               |
|                    |                    |                            |                                                                  |                 |                                               |
|                    |                    |                            |                                                                  |                 |                                               |
|                    |                    |                            |                                                                  |                 |                                               |
|                    |                    |                            |                                                                  |                 |                                               |
|                    |                    |                            |                                                                  |                 |                                               |
|                    |                    |                            |                                                                  |                 |                                               |
|                    |                    |                            |                                                                  |                 |                                               |
|                    |                    |                            |                                                                  |                 |                                               |
|                    |                    |                            |                                                                  |                 |                                               |
|                    |                    |                            |                                                                  |                 |                                               |
|                    |                    |                            |                                                                  |                 |                                               |
|                    |                    |                            |                                                                  |                 |                                               |
|                    |                    |                            |                                                                  |                 |                                               |
|                    |                    |                            |                                                                  |                 |                                               |
|                    |                    |                            |                                                                  |                 |                                               |
|                    |                    |                            |                                                                  |                 |                                               |
|                    |                    |                            |                                                                  |                 |                                               |
|                    |                    |                            |                                                                  |                 |                                               |
|                    |                    |                            |                                                                  |                 |                                               |
|                    |                    |                            |                                                                  |                 |                                               |
|                    |                    |                            |                                                                  |                 |                                               |
|                    |                    |                            |                                                                  |                 |                                               |
|                    |                    |                            |                                                                  |                 |                                               |
|                    |                    |                            |                                                                  |                 |                                               |
|                    |                    |                            |                                                                  |                 |                                               |
|                    |                    |                            |                                                                  |                 |                                               |
|                    |                    |                            |                                                                  |                 |                                               |
|                    |                    |                            |                                                                  |                 |                                               |
|                    |                    |                            |                                                                  |                 |                                               |
|                    |                    |                            |                                                                  |                 |                                               |
|                    |                    |                            |                                                                  |                 |                                               |
|                    |                    |                            |                                                                  |                 |                                               |
|                    |                    |                            |                                                                  |                 |                                               |
|                    |                    |                            |                                                                  |                 |                                               |
|                    |                    |                            |                                                                  |                 |                                               |
|                    |                    |                            |                                                                  |                 |                                               |
|                    |                    |                            |                                                                  |                 |                                               |
|                    |                    |                            |                                                                  |                 |                                               |
|                    |                    |                            |                                                                  |                 |                                               |
|                    |                    |                            |                                                                  |                 |                                               |
|                    |                    |                            |                                                                  |                 |                                               |
|                    |                    |                            |                                                                  |                 |                                               |
|                    |                    |                            |                                                                  |                 |                                               |
|                    |                    |                            |                                                                  |                 |                                               |
|                    |                    |                            |                                                                  |                 |                                               |
|                    |                    |                            |                                                                  |                 |                                               |
|                    |                    |                            |                                                                  |                 |                                               |
|                    |                    |                            |                                                                  |                 |                                               |
|                    |                    |                            |                                                                  |                 |                                               |
|                    |                    |                            |                                                                  |                 |                                               |
|                    |                    |                            |                                                                  |                 |                                               |
|                    |                    |                            |                                                                  |                 |                                               |
|                    |                    |                            |                                                                  |                 |                                               |
|                    |                    |                            |                                                                  |                 |                                               |
|                    |                    |                            |                                                                  |                 |                                               |
|                    |                    |                            |                                                                  |                 |                                               |
|                    |                    |                            |                                                                  |                 |                                               |
|                    |                    |                            |                                                                  |                 |                                               |
|                    |                    |                            |                                                                  |                 |                                               |
|                    |                    |                            |                                                                  |                 |                                               |

# Output: LaTeX

| Star                             | Sp. type           | P <sub>rot</sub><br>(days) | P <sub>cyc</sub> (range)<br>(years)                              |                  | lt <sup>c</sup> | P <sub>cyc</sub> , Balinuas et al.<br>(years) |       |      |           |
|----------------------------------|--------------------|----------------------------|------------------------------------------------------------------|------------------|-----------------|-----------------------------------------------|-------|------|-----------|
| simple cycles                    |                    |                            |                                                                  |                  |                 |                                               |       |      |           |
| HD 3651                          | K0V <sup>a</sup>   | 44 <sup>b</sup>            | 11.6(9.57–13.7)-lt                                               |                  | yes             | 13.8±0.4                                      |       |      |           |
| HD 4628                          | K2.5V <sup>a</sup> | 41.6                       | 8.94(8.30–9.5)                                                   |                  | no              | 8.37±0.08                                     |       |      |           |
| HD 10476                         | K1V <sup>a</sup>   | 33.7                       | 9.8(9.01–9.85)                                                   |                  | no              | 9.6±0.1                                       |       |      |           |
| HD 16160                         | K3V <sup>a</sup>   | 57                         | 12.1                                                             |                  | no              | 13.2±0.2                                      |       |      |           |
| HD 26965                         | K1V <sup>a</sup>   | 43 <sup>b</sup>            | 10.0(9.57–10.5)                                                  |                  | no              | 10.1±0.1                                      |       |      |           |
| HD 32147                         | K3+V <sup>a</sup>  | 39.3                       | 10.6(9.85–11.3), lt                                              |                  | yes             | 11.1±0.2                                      |       |      |           |
| HD 81809                         | G5V <sup>a</sup>   | 39.3                       | 8.69(8.10–9.28)                                                  |                  | no              | 8.17±0.08                                     |       |      |           |
| HD 103995                        | K1V <sup>a</sup>   | 36.5                       | 6.95(6.9–7.0), lt                                                |                  | yes             | 7.30±0.08                                     |       |      |           |
| HD 160346                        | K2.5V <sup>a</sup> | 35.3                       | 7.35(7.2–7.5), lt                                                |                  | yes             | 7.00±0.08                                     |       |      |           |
| HD 166620                        | K2V <sup>c</sup>   | 41.5                       | 13.6(9.6–17.6)                                                   |                  | no              | 15.8±0.3                                      |       |      |           |
| HD 201091                        | K5V                | 37.1                       | 6.95(6.7–7.2), lt                                                |                  | yes             | 7.3±0.1                                       |       |      |           |
| HD 219834B                       | K2V                | 34.0                       | 9.29(9.01–9.57)                                                  |                  | no              | 10.0±0.2                                      |       |      |           |
| Sum                              | G2V                | 27.275                     | 11(9–14), 3.65(3.3–4.0) <sup>d</sup>                             |                  | yes             |                                               |       |      |           |
| complicated cycles               |                    |                            |                                                                  |                  |                 |                                               |       |      |           |
| HD 1835                          | G2V <sup>a</sup>   | 7.84                       | 7.6(7.3–7.9), 2.4(2.50–2.28), 3.97(4.85–3.09), lt                |                  | yes             | 9.1±0.3                                       |       |      |           |
| HD 20630                         | G5V                | 9.08                       | 5.32(5.36–5.27)                                                  |                  | no              | 5.6±0.1                                       |       |      |           |
| HD 76151                         | G3V <sup>a</sup>   | 15.2                       | 5.32(6.07–4.56), lt                                              |                  | yes             | 2.52±0.02                                     |       |      |           |
| HD 78366                         | G0V                | 9.7                        | 13.45(12.6–14.3)-lt, 4.0(3.85–4.15)                              |                  | yes             | 12.2±0.4, 5.9±0.1                             |       |      |           |
| HD 95735                         | M2V                | 54                         | 3.90(3.75–4.04), 12.7(10.3–15.0)-lt                              |                  | yes             |                                               |       |      |           |
| HD 100180                        | F9.5V <sup>a</sup> | 14.6                       | 13.2(16.6–9.85), 3.63                                            |                  | no              | 3.56±0.04, 12.9±0.5                           |       |      |           |
| HD 114710                        | G0V                | 12.9                       | 16.6(17.6–13.7–18.6), 7.7(7.2–8.2), 5.25(5.1–5.4)                |                  | no              | 16.6±0.6, 9.6±0.3                             |       |      |           |
| HD 115404                        | K2.5V <sup>a</sup> | 18.8                       | 10.8(9.57–12.1), 5.08(5.83–4.33), 3.4(3.96–2.84) lt              |                  | yes             | 12.4±0.4                                      |       |      |           |
| HD 131156A                       | G8V                | 6.25                       | 3.7(3.6–3.8), 12, lt                                             |                  | yes             |                                               |       |      |           |
| HD 131156B                       | K4V                | 11.05                      | 4.2(4.64–3.76), 2.28, lt                                         |                  | yes             |                                               |       |      |           |
| HD 149661                        | K0V <sup>a</sup>   | 21.3                       | 4.0, 6.2(5.6–6.8), 12.25(11.3–13.2)-lt                           |                  | yes             | 17.4±0.7, 4.00±0.04                           |       |      |           |
| HD 152391                        | G8+V <sup>a</sup>  | 11.4                       | 9.9(12.6–7.17), 2.8(2.5–3.1)                                     |                  | no              | 10.9±0.2                                      |       |      |           |
| HD 156026                        | K5V                | 29.2                       | 4.33(3.95–4.71), 8.1, lt(approximately 20)                       |                  | yes             | 21.0±0.9                                      |       |      |           |
| HD 165341A                       | K0V <sup>a</sup>   | 18.9                       | 11.4(9–13.8), 5.17, lt                                           |                  | yes             | 5.1±0.1                                       |       |      |           |
| HD 165341B                       | K6V                | —                          | —                                                                |                  | yes             | Var                                           |       |      |           |
| HD 190406                        | G0V <sup>a</sup>   | 15.5                       | 15.8(15.0–17.6)-lt, 8.35(7.69–9.01), 4.65(4.44–4.86), 2.33, 3.01 |                  | yes             | 2.60±0.02, 16.9±0.8                           |       |      |           |
| HD 201092                        | K7V                | 34.1                       | 13.4(10.1–16.6)-lt, 4.45(4.71–4.18), (2.07:)                     |                  | yes             | 11.7±0.4                                      |       |      |           |
|                                  |                    |                            |                                                                  |                  |                 |                                               |       |      |           |
|                                  |                    | Controls                   |                                                                  | Hodgkin lymphoma |                 | Non-Hodgkin lymphoma                          |       |      |           |
|                                  |                    |                            |                                                                  | Cases            | OR              | 95% CI                                        | Cases | OR   | 95% CI    |
| Never Exposed (reference group)  |                    | 2,273                      |                                                                  | 315              | 1.00            | –                                             | 1,823 | 1.00 | –         |
| Ever Exposed                     |                    | 189                        |                                                                  | 24               | 1.06            | 0.65–1.71                                     | 184   | 1.18 | 0.95–1.46 |
| Duration of exposure             |                    |                            |                                                                  |                  |                 |                                               |       |      |           |
| <5 years                         |                    | 52                         |                                                                  | 12               | 1.14            | 0.57–2.30                                     | 49    | 1.25 | 0.84–1.86 |
| 6–15 years                       |                    | 62                         |                                                                  | 8                | 0.98            | 0.44–2.20                                     | 52    | 1.04 | 0.71–1.51 |
| ≥16 years                        |                    | 73                         |                                                                  | 4                | 1.02            | 0.36–2.90                                     | 82    | 1.27 | 0.92–1.76 |
| p-value of test for linear trend |                    |                            |                                                                  |                  |                 | 0.90                                          |       |      | 0.13      |
| Weighted duration of exposure    |                    |                            |                                                                  |                  |                 |                                               |       |      |           |
| <6 months                        |                    | 62                         |                                                                  | 14               | 1.54            | 0.79–2.99                                     | 57    | 1.10 | 0.76–1.59 |
| 7 months to 1 year               |                    | 35                         |                                                                  | 3                | 0.60            | 0.17–2.13                                     | 40    | 1.39 | 0.87–2.20 |
| >1 year                          |                    | 90                         |                                                                  | 7                | 0.84            | 0.37–1.91                                     | 86    | 1.17 | 0.87–1.59 |
| p-value of test for linear trend |                    |                            |                                                                  |                  |                 | 0.75                                          |       |      | 0.13      |
| Intensity of exposure            |                    |                            |                                                                  |                  |                 |                                               |       |      |           |
| Low                              |                    | 84                         |                                                                  | 11               | 1.05            | 0.52–2.12                                     | 85    | 1.24 | 0.91–1.70 |
| Medium                           |                    | 70                         |                                                                  | 10               | 1.19            | 0.56–2.49                                     | 66    | 1.11 | 0.79–1.57 |
| High                             |                    | 35                         |                                                                  | 3                | 0.80            | 0.23–2.74                                     | 32    | 1.14 | 0.70–1.85 |
|                                  |                    |                            |                                                                  |                  |                 |                                               |       |      |           |
|                                  |                    |                            |                                                                  |                  |                 |                                               |       |      |           |
|                                  |                    |                            |                                                                  |                  |                 |                                               |       |      |           |
|                                  |                    |                            |                                                                  |                  |                 |                                               |       |      |           |
|                                  |                    |                            |                                                                  |                  |                 |                                               |       |      |           |
|                                  |                    |                            |                                                                  |                  |                 |                                               |       |      |           |
|                                  |                    |                            |                                                                  |                  |                 |                                               |       |      |           |
|                                  |                    |                            |                                                                  |                  |                 |                                               |       |      |           |
|                                  |                    |                            |                                                                  |                  |                 |                                               |       |      |           |
|                                  |                    |                            |                                                                  |                  |                 |                                               |       |      |           |
|                                  |                    |                            |                                                                  |                  |                 |                                               |       |      |           |
|                                  |                    |                            |                                                                  |                  |                 |                                               |       |      |           |
|                                  |                    |                            |                                                                  |                  |                 |                                               |       |      |           |
|                                  |                    |                            |                                                                  |                  |                 |                                               |       |      |           |
|                                  |                    |                            |                                                                  |                  |                 |                                               |       |      |           |
|                                  |                    |                            |                                                                  |                  |                 |                                               |       |      |           |
|                                  |                    |                            |                                                                  |                  |                 |                                               |       |      |           |
|                                  |                    |                            |                                                                  |                  |                 |                                               |       |      |           |
|                                  |                    |                            |                                                                  |                  |                 |                                               |       |      |           |
|                                  |                    |                            |                                                                  |                  |                 |                                               |       |      |           |
|                                  |                    |                            |                                                                  |                  |                 |                                               |       |      |           |
|                                  |                    |                            |                                                                  |                  |                 |                                               |       |      |           |
|                                  |                    |                            |                                                                  |                  |                 |                                               |       |      |           |
|                                  |                    |                            |                                                                  |                  |                 |                                               |       |      |           |
|                                  |                    |                            |                                                                  |                  |                 |                                               |       |      |           |
|                                  |                    |                            |                                                                  |                  |                 |                                               |       |      |           |
|                                  |                    |                            |                                                                  |                  |                 |                                               |       |      |           |
|                                  |                    |                            |                                                                  |                  |                 |                                               |       |      |           |
|                                  |                    |                            |                                                                  |                  |                 |                                               |       |      |           |
|                                  |                    |                            |                                                                  |                  |                 |                                               |       |      |           |
|                                  |                    |                            |                                                                  |                  |                 |                                               |       |      |           |
|                                  |                    |                            |                                                                  |                  |                 |                                               |       |      |           |
|                                  |                    |                            |                                                                  |                  |                 |                                               |       |      |           |
|                                  |                    |                            |                                                                  |                  |                 |                                               |       |      |           |
|                                  |                    |                            |                                                                  |                  |                 |                                               |       |      |           |
|                                  |                    |                            |                                                                  |                  |                 |                                               |       |      |           |
|                                  |                    |                            |                                                                  |                  |                 |                                               |       |      |           |
|                                  |                    |                            |                                                                  |                  |                 |                                               |       |      |           |
|                                  |                    |                            |                                                                  |                  |                 |                                               |       |      |           |
|                                  |                    |                            |                                                                  |                  |                 |                                               |       |      |           |
|                                  |                    |                            |                                                                  |                  |                 |                                               |       |      |           |
|                                  |                    |                            |                                                                  |                  |                 |                                               |       |      |           |
|                                  |                    |                            |                                                                  |                  |                 |                                               |       |      |           |
|                                  |                    |                            |                                                                  |                  |                 |                                               |       |      |           |
|                                  |                    |                            |                                                                  |                  |                 |                                               |       |      |           |
|                                  |                    |                            |                                                                  |                  |                 |                                               |       |      |           |
|                                  |                    |                            |                                                                  |                  |                 |                                               |       |      |           |
|                                  |                    |                            |                                                                  |                  |                 |                                               |       |      |           |
|                                  |                    |                            |                                                                  |                  |                 |                                               |       |      |           |
|                                  |                    |                            |                                                                  |                  |                 |                                               |       |      |           |
|                                  |                    |                            |                                                                  |                  |                 |                                               |       |      |           |
|                                  |                    |                            |                                                                  |                  |                 |                                               |       |      |           |
|                                  |                    |                            |                                                                  |                  |                 |                                               |       |      |           |
|                                  |                    |                            |                                                                  |                  |                 |                                               |       |      |           |
|                                  |                    |                            |                                                                  |                  |                 |                                               |       |      |           |
|                                  |                    |                            |                                                                  |                  |                 |                                               |       |      |           |
|                                  |                    |                            |                                                                  |                  |                 |                                               |       |      |           |
|                                  |                    |                            |                                                                  |                  |                 |                                               |       |      |           |
|                                  |                    |                            |                                                                  |                  |                 |                                               |       |      |           |
|                                  |                    |                            |                                                                  |                  |                 |                                               |       |      |           |
|                                  |                    |                            |                                                                  |                  |                 |                                               |       |      |           |
|                                  |                    |                            |                                                                  |                  |                 |                                               |       |      |           |
|                                  |                    |                            |                                                                  |                  |                 |                                               |       |      |           |
|                                  |                    |                            |                                                                  |                  |                 |                                               |       |      |           |
|                                  |                    |                            |                                                                  |                  |                 |                                               |       |      |           |
|                                  |                    |                            |                                                                  |                  |                 |                                               |       |      |           |
|                                  |                    |                            |                                                                  |                  |                 |                                               |       |      |           |
|                                  |                    |                            |                                                                  |                  |                 |                                               |       |      |           |
|                                  |                    |                            |                                                                  |                  |                 |                                               |       |      |           |
|                                  |                    |                            |                                                                  |                  |                 |                                               |       |      |           |
|                                  |                    |                            |                                                                  |                  |                 |                                               |       |      |           |
|                                  |                    |                            |                                                                  |                  |                 |                                               |       |      |           |
|                                  |                    |                            |                                                                  |                  |                 |                                               |       |      |           |
|                                  |                    |                            |                                                                  |                  |                 |                                               |       |      |           |
|                                  |                    |                            |                                                                  |                  |                 |                                               |       |      |           |
|                                  |                    |                            |                                                                  |                  |                 |                                               |       |      |           |
|                                  |                    |                            |                                                                  |                  |                 |                                               |       |      |           |
|                                  |                    |                            |                                                                  |                  |                 |                                               |       |      |           |
|                                  |                    |                            |                                                                  |                  |                 |                                               |       |      |           |
|                                  |                    |                            |                                                                  |                  |                 |                                               |       |      |           |
|                                  |                    |                            |                                                                  |                  |                 |                                               |       |      |           |
|                                  |                    |                            |                                                                  |                  |                 |                                               |       |      |           |
|                                  |                    |                            |                                                                  |                  |                 |                                               |       |      |           |
|                                  |                    |                            |                                                                  |                  |                 |                                               |       |      |           |
|                                  |                    |                            |                                                                  |                  |                 |                                               |       |      |           |
|                                  |                    |                            |                                                                  |                  |                 |                                               |       |      |           |
|                                  |                    |                            |                                                                  |                  |                 |                                               |       |      |           |
|                                  |                    |                            |                                                                  |                  |                 |                                               |       |      |           |
|                                  |                    |                            |                                                                  |                  |                 |                                               |       |      |           |
|                                  |                    |                            |                                                                  |                  |                 |                                               |       |      |           |
|                                  |                    |                            |                                                                  |                  |                 |                                               |       |      |           |
|                                  |                    |                            |                                                                  |                  |                 |                                               |       |      |           |
|                                  |                    |                            |                                                                  |                  |                 |                                               |       |      |           |
|                                  |                    |                            |                                                                  |                  |                 |                                               |       |      |           |
|                                  |                    |                            |                                                                  |                  |                 |                                               |       |      |           |
|                                  |                    |                            |                                                                  |                  |                 |                                               |       |      |           |
|                                  |                    |                            |                                                                  |                  |                 |                                               |       |      |           |
|                                  |                    |                            |                                                                  |                  |                 |                                               |       |      |           |
|                                  |                    |                            |                                                                  |                  |                 |                                               |       |      |           |
|                                  |                    |                            |                                                                  |                  |                 |                                               |       |      |           |
|                                  |                    |                            |                                                                  |                  |                 |                                               |       |      |           |
|                                  |                    |                            |                                                                  |                  |                 |                                               |       |      |           |
|                                  |                    |                            |                                                                  |                  |                 |                                               |       |      |           |
|                                  |                    |                            |                                                                  |                  |                 |                                               |       |      |           |
|                                  |                    |                            |                                                                  |                  |                 |                                               |       |      |           |
|                                  |                    |                            |                                                                  |                  |                 |                                               |       |      |           |
|                                  |                    |                            |                                                                  |                  |                 |                                               |       |      |           |
|                                  |                    |                            |                                                                  |                  |                 |                                               |       |      |           |
|                                  |                    |                            |                                                                  |                  |                 |                                               |       |      |           |
|                                  |                    |                            |                                                                  |                  |                 |                                               |       |      |           |
|                                  |                    |                            |                                                                  |                  |                 |                                               |       |      |           |
|                                  |                    |                            |                                                                  |                  |                 |                                               |       |      |           |
|                                  |                    |                            |                                                                  |                  |                 |                                               |       |      |           |
|                                  |                    |                            |                                                                  |                  |                 |                                               |       |      |           |
|                                  |                    |                            |                                                                  |                  |                 |                                               |       |      |           |
|                                  |                    |                            |                                                                  |                  |                 |                                               |       |      |           |
|                                  |                    |                            |                                                                  |                  |                 |                                               |       |      |           |
|                                  |                    |                            |                                                                  |                  |                 |                                               |       |      |           |
|                                  |                    |                            |                                                                  |                  |                 |                                               |       |      |           |
|                                  |                    |                            |                                                                  |                  |                 |                                               |       |      |           |
|                                  |                    |                            |                                                                  |                  |                 |                                               |       |      |           |
|                                  |                    |                            |                                                                  |                  |                 |                                               |       |      |           |
|                                  |                    |                            |                                                                  |                  |                 |                                               |       |      |           |
|                                  |                    |                            |                                                                  |                  |                 |                                               |       |      |           |
|                                  |                    |                            |                                                                  |                  |                 |                                               |       |      |           |
|                                  |                    |                            |                                                                  |                  |                 |                                               |       |      |           |
|                                  |                    |                            |                                                                  |                  |                 |                                               |       |      |           |
|                                  |                    |                            |                                                                  |                  |                 |                                               |       |      |           |
|                                  |                    |                            |                                                                  |                  |                 |                                               |       |      |           |
|                                  |                    |                            |                                                                  |                  |                 |                                               |       |      |           |
|                                  |                    |                            |                                                                  |                  |                 |                                               |       |      |           |
|                                  |                    |                            |                                                                  |                  |                 |                                               |       |      |           |
|                                  |                    |                            |                                                                  |                  |                 |                                               |       |      |           |
|                                  |                    |                            |                                                                  |                  |                 |                                               |       |      |           |
|                                  |                    |                            |                                                                  |                  |                 |                                               |       |      |           |
|                                  |                    |                            |                                                                  |                  |                 |                                               |       |      |           |
|                                  |                    |                            |                                                                  |                  |                 |                                               |       |      |           |
|                                  |                    |                            |                                                                  |                  |                 |                                               |       |      |           |
|                                  |                    |                            |                                                                  |                  |                 |                                               |       |      |           |
|                                  |                    |                            |                                                                  |                  |                 |                                               |       |      |           |
|                                  |                    |                            |                                                                  |                  |                 |                                               |       |      |           |
|                                  |                    |                            |                                                                  |                  |                 |                                               |       |      |           |
|                                  |                    |                            |                                                                  |                  |                 |                                               |       |      |           |
|                                  |                    |                            |                                                                  |                  |                 |                                               |       |      |           |
|                                  |                    |                            |                                                                  |                  |                 |                                               |       |      |           |
|                                  |                    |                            |                                                                  |                  |                 |                                               |       |      |           |
|                                  |                    |                            |                                                                  |                  |                 |                                               |       |      |           |
|                                  |                    |                            |                                                                  |                  |                 |                                               |       |      |           |
|                                  |                    |                            |                                                                  |                  |                 |                                               |       |      |           |
|                                  |                    |                            |                                                                  |                  |                 |                                               |       |      |           |
|                                  |                    |                            |                                                                  |                  |                 |                                               |       |      |           |
|                                  |                    |                            |                                                                  |                  |                 |                                               |       |      |           |
|                                  |                    |                            |                                                                  |                  |                 |                                               |       |      |           |
|                                  |                    |                            |                                                                  |                  |                 |                                               |       |      |           |
|                                  |                    |                            |                                                                  |                  |                 |                                               |       |      |           |
|                                  |                    |                            |                                                                  |                  |                 |                                               |       |      |           |
|                                  |                    |                            |                                                                  |                  |                 |                                               |       |      |           |
|                                  |                    |                            |                                                                  |                  |                 |                                               |       |      |           |
|                                  |                    |                            |                                                                  |                  |                 |                                               |       |      |           |
|                                  |                    |                            |                                                                  |                  |                 |                                               |       |      |           |
|                                  |                    |                            |                                                                  |                  |                 |                                               |       |      |           |
|                                  |                    |                            |                                                                  |                  |                 |                                               |       |      |           |
|                                  |                    |                            |                                                                  |                  |                 |                                               |       |      |           |
|                                  |                    |                            |                                                                  |                  |                 |                                               |       |      |           |
|                                  |                    |                            |                                                                  |                  |                 |                                               |       |      |           |
|                                  |                    |                            |                                                                  |                  |                 |                                               |       |      |           |
|                                  |                    |                            |                                                                  |                  |                 |                                               |       |      |           |
|                                  |                    |                            |                                                                  |                  |                 |                                               |       |      |           |
|                                  |                    |                            |                                                                  |                  |                 |                                               |       |      |           |
|                                  |                    |                            |                                                                  |                  |                 |                                               |       |      |           |
|                                  |                    |                            |                                                                  |                  |                 |                                               |       |      |           |
|                                  |                    |                            |                                                                  |                  |                 |                                               |       |      |           |
|                                  |                    |                            |                                                                  |                  |                 |                                               |       |      |           |
|                                  |                    |                            |                                                                  |                  |                 |                                               |       |      |           |
|                                  |                    |                            |                                                                  |                  |                 |                                               |       |      |           |
|                                  |                    |                            |                                                                  |                  |                 |                                               |       |      |           |
|                                  |                    |                            |                                                                  |                  |                 |                                               |       |      |           |
|                                  |                    |                            |                                                                  |                  |                 |                                               |       |      |           |
|                                  |                    |                            |                                                                  |                  |                 |                                               |       |      |           |
|                                  |                    |                            |                                                                  |                  |                 |                                               |       |      |           |
|                                  |                    |                            |                                                                  |                  |                 |                                               |       |      |           |

Figure 5. Output of Chimera-8B on Table Format Transformation.

Input: Visual Table

| 会计年度      | 2021A  | 2022A  | 2023E  | 2024E  | 2025E  |
|-----------|--------|--------|--------|--------|--------|
| 营业收入(百万元) | 11,339 | 11,008 | 15,123 | 16,828 | 18,396 |
| YoY(%)    | 14.6   | -2.9   | 37.4   | 11.3   | 9.3    |
| 净利润(百万元)  | 101    | 113    | 1,392  | 1,991  | 2,200  |
| YoY(%)    | -8.7   | 12.8   | 1126.8 | 43.0   | 10.5   |
| 毛利率(%)    | 34.2   | 33.1   | 41.1   | 47.6   | 47.7   |
| EPS(摊薄/元) | 0.09   | 0.11   | 1.30   | 1.86   | 2.06   |
| ROE(%)    | 1.7    | 1.4    | 8.7    | 11.2   | 11.1   |
| P/E(倍)    | 408.4  | 362.1  | 29.5   | 20.6   | 18.7   |
| P/B(倍)    | 2.5    | 2.5    | 2.3    | 2.1    | 1.9    |
| 净利率(%)    | 0.9    | 1.0    | 9.2    | 11.8   | 12.0   |

| 8月排名 | 证券简称 | 占比(%) | 7月排名 | 证券简称 | 占比(%) |
|------|------|-------|------|------|-------|
| 1    | 中天科技 | 8.37% | 1    | 中天科技 | 8.43% |
| 2    | 中际旭创 | 5.07% | 2    | 中际旭创 | 4.43% |
| 3    | 新易盛  | 4.59% | 3    | 烽火通信 | 4.36% |
| 4    | 普天科技 | 4.02% | 4    | 中国联通 | 4.24% |
| 5    | 中国移动 | 3.84% | 5    | 新易盛  | 4.15% |
| 6    | 中国联通 | 3.68% | 6    | 中兴通讯 | 3.82% |
| 7    | 华测导航 | 3.58% | 7    | 华测导航 | 3.60% |
| 8    | 中兴通讯 | 3.50% | 8    | 天孚通信 | 3.52% |
| 9    | 亿联网络 | 3.03% | 9    | 普天科技 | 3.41% |
| 10   | 烽火通信 | 2.87% | 10   | 中国移动 | 3.32% |

| 公司名称 | 2023年11月累计保费收入<br>(亿元) | 同比增速  | 当月保费收入<br>(亿元) | 环比增速  |
|------|------------------------|-------|----------------|-------|
| 人保财险 | 4727                   | 6.8%  | 329            | 8.8%  |
| 车险   | 2543                   | 5.5%  | 247            | 7.7%  |
| 非车险  | 2184                   | 8.3%  | 82             | 12.1% |
| 平安财险 | 2736                   | 1.4%  | 243            | 3.4%  |
| 太保财险 | 1748                   | 11.8% | 138            | 9.7%  |
| 合计   | 9211                   | 6.0%  | 709            | 7.0%  |

Output: LaTeX

| 会计年度       | 2021A  | 2022A  | 2023E  | 2024E  | 2025E  |
|------------|--------|--------|--------|--------|--------|
| 营业收入 (百万元) | 11,339 | 11,008 | 15,123 | 16,828 | 18,396 |
| YoY(%)     | 14.6   | -2.9   | 37.4   | 11.3   | 9.3    |
| 净利润 (百万元)  | 101    | 113    | 1,392  | 1,991  | 2,200  |
| YoY(%)     | -8.7   | 12.8   | 1126.8 | 43.0   | 10.5   |
| 毛利率 (%)    | 34.2   | 33.1   | 41.1   | 47.6   | 47.7   |
| EPS(摊薄/元)  | 0.09   | 0.11   | 1.30   | 1.86   | 2.06   |
| ROE(%)     | 1.7    | 1.4    | 8.7    | 11.2   | 11.1   |
| P/E(倍)     | 408.4  | 362.1  | 29.5   | 20.6   | 18.7   |
| P/B(倍)     | 2.5    | 2.5    | 2.3    | 2.1    | 1.9    |
| 净利率 (%)    | 0.9    | 1.0    | 9.2    | 11.8   | 12.0   |

| 8月排名 | 证券简称 | 占比 (%) | 7月排名 | 证券简称 | 占比 (%) |
|------|------|--------|------|------|--------|
| 1    | 中天科技 | 8.37%  | 1    | 中天科技 | 8.43%  |
| 2    | 中际旭创 | 5.07%  | 2    | 中际旭创 | 4.43%  |
| 3    | 新易盛  | 4.59%  | 3    | 烽火通信 | 4.36%  |
| 4    | 普天科技 | 4.02%  | 4    | 中国联通 | 4.24%  |
| 5    | 中国移动 | 3.84%  | 5    | 新易盛  | 4.15%  |
| 6    | 中国联通 | 3.68%  | 6    | 中兴通讯 | 3.82%  |
| 7    | 华测导航 | 3.58%  | 7    | 华测导航 | 3.60%  |
| 8    | 中兴通讯 | 3.50%  | 8    | 天孚通信 | 3.52%  |
| 9    | 亿联网络 | 3.03%  | 9    | 普天科技 | 3.41%  |
| 10   | 烽火通信 | 2.87%  | 10   | 中国移动 | 3.32%  |

| 公司名称 | 2023年11月累计保费收入 | 同比增长  | 当月保费收入 | 环比增速  |
|------|----------------|-------|--------|-------|
| 人保财险 | 4727           | 6.8%  | 329    | 8.8%  |
| 车险   | 2543           | 5.5%  | 247    | 7.7%  |
| 非车险  | 2184           | 8.3%  | 82     | 12.1% |
| 平安财险 | 2736           | 1.4%  | 243    | 3.4%  |
| 太保财险 | 1748           | 11.8% | 138    | 9.7%  |
| 合计   | 9211           | 6.0%  | 709    | 7.0%  |

Figure 6. Output of Chimera-8B on Table Format Transformation.

## Input: Visual Chart

### Many think China's global influence will decline after the coronavirus outbreak

% who say each will have \_\_\_ influence in world affairs after the coronavirus outbreak compared to before the outbreak

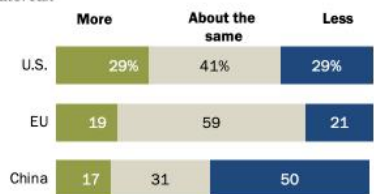

Note: No answer responses not shown.

Source: Survey of U.S. adults conducted April 29-May 5, 2020.

\*Americans Give Higher Ratings to South Korea and Germany Than U.S. for Dealing With Coronavirus

PEW RESEARCH CENTER

### Little appetite for allowing more immigrants into India

India should allow \_\_\_ immigrants

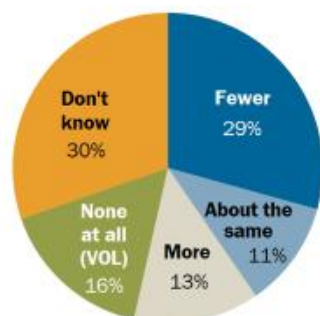

### Concerns about India on the Rise Again

Which is the greatest threat to Pakistan?

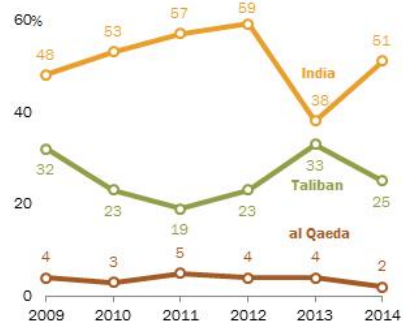

Source: Spring 2014 Global Attitudes survey. Q117.

PEW RESEARCH CENTER

## Output: Markdown

| Entity | More | About the same | Less |
|--------|------|----------------|------|
| China  | 17   | 31             | 50   |
| EU     | 19   | 59             | 21   |
| U.S.   | 29   | 41             | 29   |

| Entity            | Value |
|-------------------|-------|
| About the same    | 11    |
| More              | 13    |
| None at all (VOL) | 16    |
| Don't know        | 30    |
| Fewer             | 29    |

| Entity   | 2009 | 2010 | 2011 | 2012 | 2013 | 2014 |
|----------|------|------|------|------|------|------|
| al Qaeda | 4.0  | 3.0  | 5.0  | 4.0  | 4.0  | 2.0  |
| Taliban  | 32.0 | 23.0 | 19.0 | 23.0 | 33.0 | 25.0 |
| India    | 48.0 | 53.0 | 57.0 | 59.0 | 38.0 | 51.0 |

Figure 7. Output of Chimera-8B on Chart Structural Extraction.

## Input: Visual Chart

### Global views of Trump's characteristics

% who say they think of President Donald Trump as ...

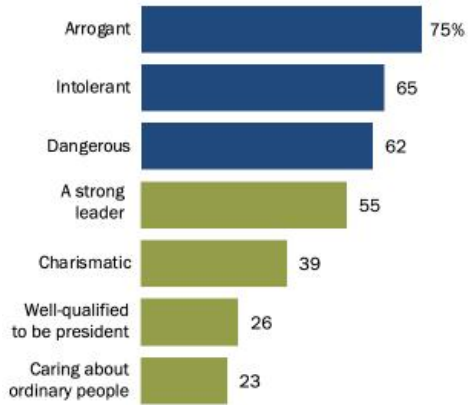

Note: Percentages are global medians based on 37 countries.  
Source: Spring 2017 Global Attitudes Survey.

PEW RESEARCH CENTER

### Older Republicans especially likely to see Trump as fighting for their beliefs

Among **Republicans and Republican leaners**, % who say the phrase 'fights for what I believe in' describes Trump ...

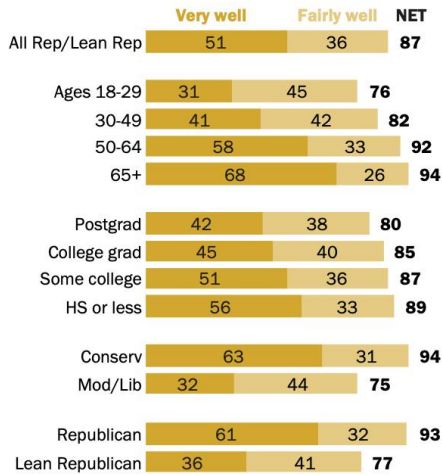

Note: Based on Republicans and Republican-leaning independents.  
Source: Survey of U.S. adults conducted Feb. 4-15, 2020.

PEW RESEARCH CENTER

## Output: Markdown

| Entity                         | Value |
|--------------------------------|-------|
| Caring about ordinary people   | 23    |
| Well-qualified to be president | 26    |
| Charismatic                    | 39    |
| A strong leader                | 55    |
| Dangerous                      | 62    |
| Intolerant                     | 65    |
| Arrogant                       | 75    |

| Entity           | Very well | Fairly well | NET |
|------------------|-----------|-------------|-----|
| Lean Republican  | 36        | 41          | 77  |
| Republican       | 61        | 32          | 93  |
| Mod/Lib          | 32        | 44          | 75  |
| Conserv          | 63        | 31          | 94  |
| HS or less       | 56        | 33          | 89  |
| Some college     | 51        | 36          | 87  |
| College grad     | 45        | 40          | 85  |
| Postgrad         | 42        | 38          | 80  |
| 65+              | 68        | 26          | 94  |
| 50-64            | 58        | 33          | 92  |
| 30-49            | 41        | 42          | 82  |
| Ages 18-29       | 31        | 45          | 76  |
| All Rep/Lean Rep | 51        | 36          | 87  |

Figure 8. Output of Chimera-8B on Chart Structural Extraction.

## Input: Visual Chart

### Land use per 100 kilocalories by food and production type

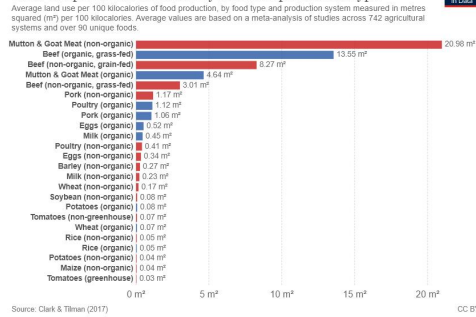

### Country Programmable Aid (CPA) received, 2005 to 2012

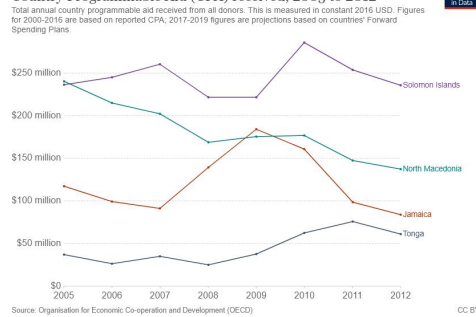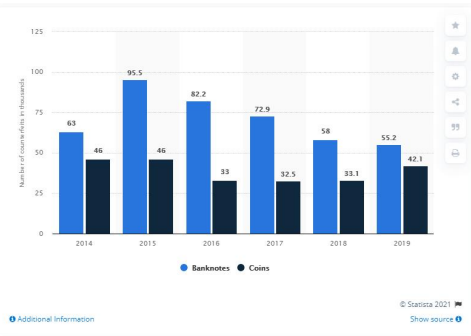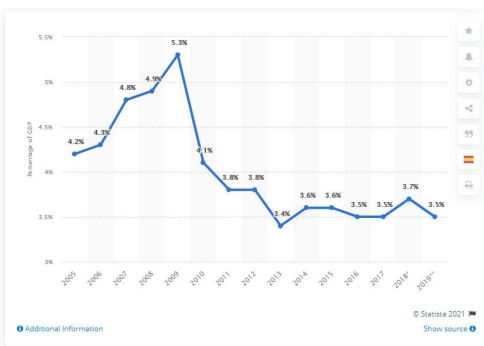

## Output: Markdown

| Country                          | Land use per 100 kilocalories by food and production type |
|----------------------------------|-----------------------------------------------------------|
| Mutton & Goat Meat (non-organic) | 20.98 m²                                                  |
| Beef (organic, grass-fed)        | 13.55 m²                                                  |
| Beef (non-organic, grain-fed)    | 8.27 m²                                                   |
| Mutton & Goat Meat (organic)     | 4.64 m²                                                   |
| Beef (non-organic, grass-fed)    | 3.01 m²                                                   |
| Pork (non-organic)               | 1.17 m²                                                   |
| Poultry (organic)                | 1.12 m²                                                   |
| Pork (organic)                   | 1.06 m²                                                   |
| Eggs (organic)                   | 0.52 m²                                                   |
| Milk (organic)                   | 0.45 m²                                                   |
| Poultry (non-organic)            | 0.41 m²                                                   |
| Eggs (non-organic)               | 0.34 m²                                                   |
| Barley (non-organic)             | 0.27 m²                                                   |
| Milk (non-organic)               | 0.23 m²                                                   |
| Wheat (non-organic)              | 0.17 m²                                                   |
| Soybean (non-organic)            | 0.08 m²                                                   |
| Potatoes (organic)               | 0.08 m²                                                   |
| Tomatoes (non-greenhouse)        | 0.07 m²                                                   |
| Wheat (organic)                  | 0.07 m²                                                   |
| Rice (non-organic)               | 0.05 m²                                                   |
| Rice (organic)                   | 0.05 m²                                                   |
| Potatoes (non-organic)           | 0.04 m²                                                   |
| Maize (non-organic)              | 0.04 m²                                                   |
| Tomatoes (greenhouse)            | 0.03 m²                                                   |

| Entity          | 2005  | 2006  | 2007  | 2008  | 2009  | 2010  | 2011  | 2012  |
|-----------------|-------|-------|-------|-------|-------|-------|-------|-------|
| Solomon Islands | 239.0 | 246.0 | 265.0 | 223.0 | 223.0 | 286.0 | 256.0 | 237.0 |
| North Macedonia | 239.0 | 214.0 | 202.0 | 171.0 | 179.0 | 179.0 | 148.0 | 138.0 |
| Jamaica         | 119.0 | 99.0  | 93.0  | 141.0 | 186.0 | 163.0 | 99.0  | 86.0  |
| Tonga           | 38.0  | 28.0  | 38.0  | 26.0  | 37.0  | 63.0  | 77.0  | 62.0  |

| Characteristic | Banknotes | Coins |
|----------------|-----------|-------|
| 2019           | 55.2      | 42.1  |
| 2018           | 58.0      | 33.1  |
| 2017           | 72.9      | 32.5  |
| 2016           | 82.2      | 33.0  |
| 2015           | 95.5      | 46.0  |
| 2014           | 63.0      | 46.0  |

| Characteristic | Percentage of GDP |
|----------------|-------------------|
| 2019**         | 3.5%              |
| 2018*          | 3.7%              |
| 2017           | 3.5%              |
| 2016           | 3.5%              |
| 2015           | 3.6%              |
| 2014           | 3.6%              |
| 2013           | 3.4%              |
| 2012           | 3.8%              |
| 2011           | 3.8%              |
| 2010           | 4.1%              |
| 2009           | 5.3%              |
| 2008           | 4.9%              |
| 2007           | 4.8%              |
| 2006           | 4.3%              |
| 2005           | 4.2%              |

Figure 9. Output of Chimera-8B on Chart Structural Extraction.

# Input: Document Page

HYDROLOGICAL PROCESSES  
*Hydrol. Process.* **16**, 3131–3150 (2002)  
Published online 7 August 2002 in Wiley InterScience (www.interscience.wiley.com). DOI: 10.1002/hyp.1092

## Daily streamflow modelling and assessment based on the curve-number technique

Jin-Yong Choi,<sup>1</sup>\* Bernard A. Engel<sup>1</sup> and Ha Woo Chung<sup>2</sup>

<sup>1</sup> Department of Agricultural and Biological Engineering, Purdue University, West Lafayette, IN 47907-1146, USA,

<sup>2</sup> Division of Biological Resources and Material Engineering, Seoul National University, Suwon, Kyonggi 441-744, South Korea

### Abstract:

A cell-based long-term hydrological model (CELTHYM) that can be integrated with a geographical information system (GIS) was developed to predict continuous stream flow from small agricultural watersheds. The CELTHYM uses a cell-by-cell soil moisture balance approach. For surface runoff estimation, the curve number technique considering soil moisture on a daily basis was used, and release rate was used to estimate baseflow. Evapotranspiration was computed using the FAO modified Penman equation that considered land-use-based crop coefficients, soil moisture and the influence of topography on radiation. A rice paddy field water budget model was also adapted for the specific application of the model to East Asia. Model sensitivity analysis was conducted to obtain operational information about the model calibration parameters. The CELTHYM was calibrated and verified with measured runoff data from the WS#1 and WS#3 watersheds of the Seoul National University, Department of Agricultural Engineering, in Hwasong County, Kyonggi Province, South Korea. The WS#1 watershed is comprised of about 35.4% rice paddy fields and 42.3% forest, whereas the WS#3 watershed is about 85.0% forest and 11.5% rice paddy fields. The CELTHYM was calibrated for the parameter release rate,  $K$ , and soil moisture storage coefficient, STC, and results were compared with the measured runoff data for 1986. The validation results for WS#1 considering all daily stream flow were poor with  $R^2$ ,  $E^2$  and RMSE having values of 0.40, -6.63 and 9.69 (mm), respectively, but validation results for days without rainfall were statistically significant ( $E^2 = 0.66$ ). Results for WS#3 showed good agreement with observed data for all days, and  $R^2$ ,  $E^2$  and RMSE were 0.92, 0.91 and 2.23 (mm), respectively, suggesting potential for CELTHYM application to other watersheds. The direct runoff and water balance components for watershed WS#1 with significant areas of paddy fields did not perform well, suggesting that additional study of these components is needed. Copyright © 2002 John Wiley & Sons, Ltd.

**KEY WORDS** watershed modelling; GIS; soil moisture balance; grid-based modelling; paddy field water balance; model calibration; sensitivity analysis; model assessment

### INTRODUCTION

Water resources development and watershed management require an understanding of hydrological variations owing to changes in watershed characteristics over long-term periods (Bhaduri *et al.*, 2000), and spatial variability of watershed characteristics that affect hydrological phenomenon also must be evaluated in heterogeneous land-use watersheds. However, hydrological model operations that reflect long-term watershed changes often have limitations owing to difficulties obtaining measured hydrological data and data quantifying land use and soil characteristics. Therefore, simulation of stream flow on a daily basis using a long-term hydrological model that is simple to operate with readily available data is needed.

Continuous models, also called long-term hydrological models or continuous stream flow models, typically are focused on estimating water yield from a watershed. Owing to complications and difficulties related to data preparation and operation, however, these hydrological models largely have been used for daily, 10-day and

11 | One View, London Borough of Barking and Dagenham, London, UK

Gaining staff support is also key to ensuring the tool's continued improvement. Addressing the challenge of data linkage specifically, Katy Brown said: "We are doing more to communicate to users why, in some instances, they might not be able to view a record or why it is matched incorrectly (i.e., conflicting information in different case management systems), which is not the fault of One View directly. At a high level, this is to try and lift staff understanding of the process and to maintain trust/understanding in the system."

- **Clear feedback mechanism:** It is important to the project team that improvements to One View are driven by frontline staff feedback. Jill Gallagher described how this works in practice: "Frontline staff give us some great narratives around what's going on for them and how the needs have changed for the people they're serving. We are able to take that information and then adapt One View to meet that need." This may involve going back to the individual services to address data quality issues: "We have in some areas gone back to services to address some data quality issues and improve things from the point of data entry," said Rhodri Rowlands. This was echoed by Katy Brown: "If staff find information in a case summary they know to be wrong, then we are doing a big push for staff to report it, so we can look at it in the background and amend."

For example, staff feedback has led to increased frequency of data collection. As described in the Key challenges section, data is extracted at different frequencies and can be out of date. Debt information used to be extracted monthly, but LBBDD have increased the frequency of these extracts to weekly based on staff feedback. "We are speaking to staff to identify the priority datasets and do what we can to increase their frequency and mitigate the impact of 'time' on the data presented," said Katy Brown.

- **Information governance (IG):** for the service delivery team, it's been very reassuring to know that there is robust IG. Gill Wilson describes her confidence in the tool's IG compliance: "One View has got a very, very good structure to it that embeds the Data Protection Act, the EU's General Data Protection Regulation, so that you know whenever you go in, you only get access to what is at your level. The formal process around the data protection, but also the formal process around the governance structure with the board and everything, it all feeds into the management board. It's very good. It's very strong."

# Output: Markdown

## Daily stream flow modelling and assessment based on the curve-number technique

Jin-Yong Choi,<sup>1</sup> Bernard A. Engel<sup>1</sup> and HaWooChung<sup>2</sup> Department of Agricultural and Biological Engineering,Purdue University,West Lafayette,IN47907-1146, USA, Z Division of Biological Resources and Material Engineering,Soupi National University,Shonvik 41-744, South Korea

### Abstract:

A cell-based long-term hydrological model (CELTHYM) that can be integrated with a geographical information system (GIS) was developed to predict continuous stream flow from small agricultural watersheds. The CELTYHM uses a cell-by-cell soil moisture balance approach. For surface runoff estimation, the curve number technique considering soil moisture on a daily basis was used, and release rate was used to estimate baseflow. Evapotranspiration was computed using the FAO modified Penman equation which considered land-use-based crop coefficients, soil moisture and the influence of topography on radiation. A rice paddy field water budget model was also adapted for the specific application of the model to East Asia. Moisture sensitivity analysis is conducted to obtain approximately information about the model calibration parameters. The CELTYHM was calibrated and verified with measured runoff data from the WS1 and WS3 watersheds of the Seoul National University, Department of Agricultural Engineering, Hwasong County, KyngysipinProcesosSouth Korea. The WS3 watersheds are comprised of about 5% rice raps dpair fields and 42.3% forest, whereas the WS3 watersheds about 85 - 0% forest and 11 - 5% rice paddy fields. The CELTYHM was calibrated for the parameter radii of stormcoraleum storage coefficient, TSC, and results were compared with the measured runoff data for 1986. Thawidalaznresu t s for WSO1 considering all daily stream flow were poor with  $R^2$ s, and RMSE having values of +0.6 - (-0.6) and (+0.6) - (-0.6) - equation for (mm), respectively, but only results for days without rainfall were statistically significant ( $R^2 = 0.66$ ). Results for WS3 showed good agreement with observed data for all days, and  $R^2$ s and RMSE were +0.2 - 0.9, and 2.2 - mm, respectively, suggesting potential for CELLYYM application to other watersheds in the right-of-day balance components for watersheds WS1 with significant areas of paddies did not perform well, suggesting that additional study of these components is needed. Copyright 2002 John Wiley & Sons, Ltd.

### KEYWORDS

Water resources development and watershed management require an understanding of hydraulic variations owing to changes in watershed characteristics over long-term periods (Badur *et al.*, 2000), and spatial variability of weather shaded characteristics that affect hydrological phenomenon also must be evaluated in heterogeneous land-use watersheds. However, hydrological model operations that reflect long-term watershed changes often have limitations owing to difficulties obtaining measured hydrological data and data quantifying land use and soil characteristics. Therefore, multination of stream flow on a daily basis using a long-term hydrological model that is simple to operate with readily available data is needed.

Continuous models, also called long-term hydrological models or continuous stream flow models, typically are focused on estimating water yield from a watershed. Owing to complications and difficulties related to data preparation and operation, however, these hydrological models largely have been used for daily, 10-day and

Gaining staff support is also key to ensuring the tool's continued improvement. Addressing the challenge of data linkage specifically, Katy Brown said: "We are doing more to communicate to users why, in some instances, they might not be able to view a record or why it is matched incorrectly (i.e., conflicting information in different case management systems), which is not the fault of One View directly. At a high level, this is to try and lift staff understanding of the process and to maintain trust/interesting in the system."

• **Clear feedback mechanism:** it is important to the project team that improvements to One View are driven by frontline staff feedback. Yilgallagerceddesithowthisworks in practice. "Frontline staff give us some great narratives around what's going on for them and how the needs have changed for the points they're serving. We are able to take that information and then adapt One View to meet that need." This may involve going back to the individual services to address data quality issues: "We have in some areas gone back to services to address some data quality issues and improve the frontlines of the point of data entry," said Rhodri Rowlands. This was echoed by Katy Brown: "If staff find information in a case manner they know to be wrong, then we are doing a big push for staff to report it, so we can look at it in the background and amend."

For example, staff feedback has led to increased frequency of data collection. As described in the Key challenges section, the data is extracted at different frequencies and can be out of date. Debt information used to be extracted monthly, but LBBDD have increased the frequency of these extracts to weekly based on staff feedback. "We are speaking to staff to identify the priority datasets and do what we can to increase their frequency and mitigate the impact of 'time' on the data presented," said Katy Brown.

• **Information governance (IG):** for the service delivery team, it's been very reassuring to know that there is robust IG. Gill Wilson describes her confidence in the tool's IG compliance: "One View has got a very, very great structure to it that embeds the Data Protection Act, the EU's General Data Protection Regulation, so that you know whenever you go in, you only get access to what is at your level. The formal process around the data protection, but also the formal process around the governance structure with the board and everything, it all feeds into the management board. It's very good. It's very strong."

Figure 10. Output of Chimera on Document Context Extraction.

## Output: Markdown

The apparent discrepancy between natural history studies and the results of the present study, the observational study and the prospective cohort on CIS and clinical trials that do not show differences in outcomes among different topographies may be explained by our observational study, which demonstrates that, overall, patients with ON may have a better outcome because, as a group, they have more chances for normal baseline MRI results than patients with other CISs. Differential diagnosis in patients with subacute visual loss is comprehensible, and other causes that mimic inflammatory-demyelinating ON are difficult to identify. In our study, the results of the baseline and follow-up MRI results, his or her prognosis does not differ from that of other patients with different CISs. MRI at baseline, not CIS topography, appears to be the crucial issue at MS presentation.

1. Confavreux C, Vukusic S, Adeleine P. Early clinical predictors and progression of irreversible disability in multiple sclerosis: an amnesic process. *Brain* 2003;126:770-782.
2. Weinstenker BG, Bass GP, Rice J, et al. The natural history of multiple sclerosis: a geographically based study. I. Clinical course and disability. *Brain* 1989;112:133-146.
3. Weinstenker BG. Natural History of Multiple Sclerosis. *Ann Neurol* 1994;36:S6-S11.
4. Runmarker B, Andersen O. Prognostic factors in multiple sclerosis incidence cohort with twenty-five years of follow-up. *Brain* 1993;116:117-134.

214 Annals of Neurology Vol 57 No 2 February 2005

6. Bess PA, Ciccarilli O, Jonathon LE, et al. A longitudinal study of abnormalities on MRI and disability from multiple sclerosis. *N Engl J Med* 2002;346:158-164.
7. Morrissey SP, Miller DH, Kendall BE, et al. The significance of abnormal brain MRI in the diagnosis of multiple sclerosis: presentation with clinically isolated syndromes suggests multiple sclerosis. A 5-year follow-up study. *Brain* 1993;116:1329-1339.
8. O'Riordan JL, Thompson AJ, Kingsley DPE, et al. The prognostic value of brain MRI in clinically isolated syndromes of the CNS: a 10-year follow-up. *Brain* 1998;121:495-503.
9. Kieseier MC, Gold C, Kieseier BS, et al. Interferon-beta-1a interferes with interferon-beta-1a therapy initiated during a first demyelinating event in multiple sclerosis. *N Engl J Med* 2000;343:838-844.
10. Filippi M, Barkhof F, et al. Effect of early interferon treatment on conversion to definite multiple sclerosis: a randomized study. *Lancet* 2001;357:1576-1582.
11. Tintoré M, Rovina A, Rio J, et al. New diagnostic criteria for multiple sclerosis: application in first demyelinating episode. *Neurology* 2000;55:27-30.
12. Frohman EM, Goodin DS, Calabresi PA, et al. The utility of MRI in suspected multiple sclerosis: the results of the therapeutic monitoring of interferon-beta in the guidelines from the international panel on the diagnosis of multiple sclerosis. *Ann Neurol* 2001;50:121-127.
13. McDonald WI, Compston A, Edan G, et al. Recommended standard: diagnosis of multiple sclerosis: principles of the international panel on the diagnosis of multiple sclerosis. *Ann Neurol* 2001;50:121-127.
14. Anderson M, Alvarez C, Tintoré M, et al. Cerebrospinal fluid oligoclonal bands: diagnosis of multiple sclerosis? *J Neurol Neurosurg Psychiatry* 1994;57:897-902.
15. Barkhof F, Filippi M, Miller DH, et al. Comparison of MRI at first presentation to predict conversion to clinically definite multiple sclerosis. *Brain* 1997;120:2059-2069.
16. Poser CM, Paty DW, Scheinberg L, et al. New diagnostic criteria for multiple sclerosis: guidelines for research purposes. *Ann Neurol* 1983;13:227-231.
17. Tintoré M, Rovina A, Martínez MJ, et al. Isolated demyelination on MRI: comparison of the risk of conversion to clinically definite multiple sclerosis. *Ann Neurol* 2000;47:702-706.
18. Beck RW, Cleary PA, Anderson MM Jr, et al. A randomized, controlled trial comparing interferon treatment of acute optic neuritis. The Optic Neuritis Study Group. *N Engl J Med* 1992;327:581-588.
19. Tintoré M, Rovina A, et al. The development of multiple sclerosis following an isolated episode of optic neuritis. Magnetic resonance study. *Med Clin (Barc)* 1997;370:370-372.
20. Rodriguez M, Siva A, Crou SA, et al. Optic neuritis: a population-based study in Olmsted County, Minnesota. *Neurology* 1995;45:244-250.
21. Miller DH, Omeded JEC, McDonald WI, et al. The early risk of multiple sclerosis in patients with optic neuritis. *J Neurol Neurosurg Psychiatry* 1988;51:1569-1571.
22. Söderström M, Ya-Ping J, Hiller J, Link H. Optic neuritis. A review of 100 cases with emphasis on MRI, CSF and HLA findings. *Neurology* 1998;50:708-711.
23. Jacobs LD, Kaba SE, Miller CM, et al. Correlation of clinical and MRI CSF findings in optic neuritis. *Ann Neurol* 1997;41:91-95.

The apparent discrepancy between natural history studies that claimed that ON has a better outcome and the prospective cohort on CSIs and clinical trials that do not show differences in outcomes among different topographies may be explained by our observational study, which demonstrates that overall, patients with ON may have a better outcome because, as a group, they have more chances for normal baseline MRI results than patients with other CSIs. Diffuse cortical lesions in patients with subvisual loss is comprehensible, and other causes that mimic inflammatory/demyelinating ON are difficult to identify. Nevertheless, if a patient with ON has abnormal baseline MRI results, his or her prognosis does not differ from that of other patients with different CSIs. MRI at baseline, not CIS topology, appears to be the crucial issue at MS presentation.

1. Confavreux C, Vukobratovic S, Ales J, P. Early clinical predictors and progression of irreversible disability in multiple sclerosis: an antimetabolite process. *Bank* 2003;126:770-782.
2. Weinshenker BG, Bass GP, Rice J, et al. The natural history of multiple sclerosis: a geographically based study. I. Clinical course and disability. *Brain* 1989;112:133-146.
3. Weinshenker BG. Natural History of Multiple Sclerosis. *Annals Neurology* 1994;36:S5-S11.
4. Runmark B, Anderson O. Prognostic factors in multiple sclerosis: incidence cohort with twenty-five years of follow-up. *Brain* 1993;116:117-134.
5. Breni PA, Corallo O, Jonathan L, et al. A longitudinal study of abnormalities on MRI and disability in multiple sclerosis. *Neurology* 2002;158:164.
6. Moriarty SP, Miller DH, Kendall BE, et al. The significance of brain magnetic resonance imaging abnormalities at presentation with clinical syndromes suggestive of multiple sclerosis: a 5-year follow-up study. *Bamthook F*. *EVEN* 2000;343-360.
7. Offord, D., T. Thomson, A. J. Kingsley, D. P. E. et al. The prognosis of relapsing and remitting in clinically isolated syndromes of the CNS: a 10-year follow-up. *Brain* 1998;121:485-503.
8. Jacobs LD, Beck RW, Simon JH, et al. Intraocular uveitis: interferon-beta type I treatment during a first demyelinating event in multiple sclerosis. *Neurology* 2000;54:343.
9. Cimo G, Filippi M, Barkhof F, et al. Effect of early interferon beta treatment on conversion to multiple sclerosis in patients with clinically isolated syndrome: a randomized study. *Lancet* 2001;357:1576-1582.
10. Tintore M, Riva A, Rio J, et al. Optic neuritis to brainstem longitudinal systems and myelin: early conversion to multiple sclerosis. *Medicine* 2000;79:120-126.
11. Tintore M, Riva A, Rio J, et al. Optic neuritis to brainstem longitudinal systems and myelin: early conversion to multiple sclerosis. *Medicine* 2000;79:120-126.
12. Tintore M, Riva A, Rio J, et al. Optic neuritis to brainstem longitudinal systems and myelin: early conversion to multiple sclerosis. *Medicine* 2000;79:120-126.
13. Tintore M, Riva A, Rio J, et al. Optic neuritis to brainstem longitudinal systems and myelin: early conversion to multiple sclerosis. *Medicine* 2000;79:120-126.
14. Tintore M, Riva A, Rio J, et al. Optic neuritis to brainstem longitudinal systems and myelin: early conversion to multiple sclerosis. *Medicine* 2000;79:120-126.
15. Tintore M, Riva A, Rio J, et al. Optic neuritis to brainstem longitudinal systems and myelin: early conversion to multiple sclerosis. *Medicine* 2000;79:120-126.
16. Tintore M, Riva A, Rio J, et al. Optic neuritis to brainstem longitudinal systems and myelin: early conversion to multiple sclerosis. *Medicine* 2000;79:120-126.
17. Tintore M, Riva A, Rio J, et al. Optic neuritis to brainstem longitudinal systems and myelin: early conversion to multiple sclerosis. *Medicine* 2000;79:120-126.
18. Tintore M, Riva A, Rio J, et al. Optic neuritis to brainstem longitudinal systems and myelin: early conversion to multiple sclerosis. *Medicine* 2000;79:120-126.
19. Tintore M, Riva A, Rio J, et al. Optic neuritis to brainstem longitudinal systems and myelin: early conversion to multiple sclerosis. *Medicine* 2000;79:120-126.
20. Tintore M, Riva A, Rio J, et al. Optic neuritis to brainstem longitudinal systems and myelin: early conversion to multiple sclerosis. *Medicine* 2000;79:120-126.
21. Tintore M, Riva A, Rio J, et al. Optic neuritis to brainstem longitudinal systems and myelin: early conversion to multiple sclerosis. *Medicine* 2000;79:120-126.
22. Tintore M, Riva A, Rio J, et al. Optic neuritis to brainstem longitudinal systems and myelin: early conversion to multiple sclerosis. *Medicine* 2000;79:120-126.
23. Tintore M, Riva A, Rio J, et al. Optic neuritis to brainstem longitudinal systems and myelin: early conversion to multiple sclerosis. *Medicine* 2000;79:120-126.
24. Tintore M, Riva A, Rio J, et al. Optic neuritis to brainstem longitudinal systems and myelin: early conversion to multiple sclerosis. *Medicine* 2000;79:120-126.
25. Tintore M, Riva A, Rio J, et al. Optic neuritis to brainstem longitudinal systems and myelin: early conversion to multiple sclerosis. *Medicine* 2000;79:120-126.
26. Tintore M, Riva A, Rio J, et al. Optic neuritis to brainstem longitudinal systems and myelin: early conversion to multiple sclerosis. *Medicine* 2000;79:120-126.
27. Tintore M, Riva A, Rio J, et al. Optic neuritis to brainstem longitudinal systems and myelin: early conversion to multiple sclerosis. *Medicine* 2000;79:120-126.
28. Tintore M, Riva A, Rio J, et al. Optic neuritis to brainstem longitudinal systems and myelin: early conversion to multiple sclerosis. *Medicine* 2000;79:120-126.
29. Tintore M, Riva A, Rio J, et al. Optic neuritis to brainstem longitudinal systems and myelin: early conversion to multiple sclerosis. *Medicine* 2000;79:120-126.
30. Tintore M, Riva A, Rio J, et al. Optic neuritis to brainstem longitudinal systems and myelin: early conversion to multiple sclerosis. *Medicine* 2000;79:120-126.
31. Tintore M, Riva A, Rio J, et al. Optic neuritis to brainstem longitudinal systems and myelin: early conversion to multiple sclerosis. *Medicine* 2000;79:120-126.
32. Tintore M, Riva A, Rio J, et al. Optic neuritis to brainstem longitudinal systems and myelin: early conversion to multiple sclerosis. *Medicine* 2000;79:120-126.
33. Tintore M, Riva A, Rio J, et al. Optic neuritis to brainstem longitudinal systems and myelin: early conversion to multiple sclerosis. *Medicine* 2000;79:120-126.
34. Tintore M, Riva A, Rio J, et al. Optic neuritis to brainstem longitudinal systems and myelin: early conversion to multiple sclerosis. *Medicine* 2000;79:120-126.
35. Tintore M, Riva A, Rio J, et al. Optic neuritis to brainstem longitudinal systems and myelin: early conversion to multiple sclerosis. *Medicine* 2000;79:120-126.
36. Tintore M, Riva A, Rio J, et al. Optic neuritis to brainstem longitudinal systems and myelin: early conversion to multiple sclerosis. *Medicine* 2000;79:120-126.
37. Tintore M, Riva A, Rio J, et al. Optic neuritis to brainstem longitudinal systems and myelin: early conversion to multiple sclerosis. *Medicine* 2000;79:120-126.
38. Tintore M, Riva A, Rio J, et al. Optic neuritis to brainstem longitudinal systems and myelin: early conversion to multiple sclerosis. *Medicine* 2000;79:120-126.
39. Tintore M, Riva A, Rio J, et al. Optic neuritis to brainstem longitudinal systems and myelin: early conversion to multiple sclerosis. *Medicine* 2000;79:120-126.
40. Tintore M, Riva A, Rio J, et al. Optic neuritis to brainstem longitudinal systems and myelin: early conversion to multiple sclerosis. *Medicine* 2000;79:120-126.
41. Tintore M, Riva A, Rio J, et al. Optic neuritis to brainstem longitudinal systems and myelin: early conversion to multiple sclerosis. *Medicine* 2000;79:120-126.
42. Tintore M, Riva A, Rio J, et al. Optic neuritis to brainstem longitudinal systems and myelin: early conversion to multiple sclerosis. *Medicine* 2000;79:120-126.
43. Tintore M, Riva A, Rio J, et al. Optic neuritis to brainstem longitudinal systems and myelin: early conversion to multiple sclerosis. *Medicine* 2000;79:120-126.
44. Tintore M, Riva A, Rio J, et al. Optic neuritis to brainstem longitudinal systems and myelin: early conversion to multiple sclerosis. *Medicine* 2000;79:120-126.
45. Tintore M, Riva A, Rio J, et al. Optic neuritis to brainstem longitudinal systems and myelin: early conversion to multiple sclerosis. *Medicine* 2000;79:120-126.
46. Tintore M, Riva A, Rio J, et al. Optic neuritis to brainstem longitudinal systems and myelin: early conversion to multiple sclerosis. *Medicine* 2000;79:120-126.
47. Tintore M, Riva A, Rio J, et al. Optic neuritis to brainstem longitudinal systems and myelin: early conversion to multiple sclerosis. *Medicine* 2000;79:120-126.
48. Tintore M, Riva A, Rio J, et al. Optic neuritis to brainstem longitudinal systems and myelin: early conversion to multiple sclerosis. *Medicine* 2000;79:120-126.
49. Tintore M, Riva A, Rio J, et al. Optic neuritis to brainstem longitudinal systems and myelin: early conversion to multiple sclerosis. *Medicine* 2000;79:120-126.
50. Tintore M, Riva A, Rio J, et al. Optic neuritis to brainstem longitudinal systems and myelin: early conversion to multiple sclerosis. *Medicine* 2000;79:120-126.
51. Tintore M, Riva A, Rio J, et al. Optic neuritis to brainstem longitudinal systems and myelin: early conversion to multiple sclerosis. *Medicine* 2000;79:120-126.
52. Tintore M, Riva A, Rio J, et al. Optic neuritis to brainstem longitudinal systems and myelin: early conversion to multiple sclerosis. *Medicine* 2000;79:120-126.
53. Tintore M, Riva A, Rio J, et al. Optic neuritis to brainstem longitudinal systems and myelin: early conversion to multiple sclerosis. *Medicine* 2000;79:120-126.
54. Tintore M, Riva A, Rio J, et al. Optic neuritis to brainstem longitudinal systems and myelin: early conversion to multiple sclerosis. *Medicine* 2000;79:120-126.
55. Tintore M, Riva A, Rio J, et al. Optic neuritis to brainstem longitudinal systems and myelin: early conversion to multiple sclerosis. *Medicine* 2000;79:120-126.
56. Tintore M, Riva A, Rio J, et al. Optic neuritis to brainstem longitudinal systems and myelin: early conversion to multiple sclerosis. *Medicine* 2000;79:120-126.
57. Tintore M, Riva A, Rio J, et al. Optic neuritis to brainstem longitudinal systems and myelin: early conversion to multiple sclerosis. *Medicine* 2000;79:120-126.
58. Tintore M, Riva A, Rio J, et al. Optic neuritis to brainstem longitudinal systems and myelin: early conversion to multiple sclerosis. *Medicine* 2000;79:120-126.
59. Tintore M, Riva A, Rio J, et al. Optic neuritis to brainstem longitudinal systems and myelin: early conversion to multiple sclerosis. *Medicine* 2000;79:120-126.
60. Tintore M, Riva A, Rio J, et al. Optic neuritis to brainstem longitudinal systems and myelin: early conversion to multiple sclerosis. *Medicine* 2000;79:120-126.
61. Tintore M, Riva A, Rio J, et al. Optic neuritis to brainstem longitudinal systems and myelin: early conversion to multiple sclerosis. *Medicine* 2000;79:120-126.
62. Tintore M, Riva A, Rio J, et al. Optic neuritis to brainstem longitudinal systems and myelin: early conversion to multiple sclerosis. *Medicine* 2000;79:120

Figure 11. Output of Chimera on Document Context Extraction.

# Input: Document Page

GBE

## Y-Chromosome Variation in Southern African Khoe-San Populations Based on Whole-Genome Sequences

Thijssen Naidoo<sup>1,2,3,4,5</sup>, Jingzi Xu<sup>1,6</sup>, Mario Vicente<sup>1</sup>, Helena Malmström<sup>1,5</sup>, Himla Soodyall<sup>7,8</sup>,  
Matthias Jakobsson<sup>1,3,5</sup>, and Carina M. Schliebusch<sup>1,3,5,\*</sup>

<sup>1</sup>Human Evolution, Department of Organismal Biology, Evolutionary Biology Centre, Uppsala University, Sweden

<sup>2</sup>Department of Archaeology and Classical Studies, Stockholm University, Sweden

<sup>3</sup>Science for Life Laboratory, Uppsala, Sweden

<sup>4</sup>Centre for Palaeogenetics, Stockholm, Sweden

<sup>5</sup>Palaeo-Research Institute, University of Johannesburg, Auckland Park, South Africa

<sup>6</sup>Division of Human Genetics, School of Pathology, Faculty of Health Sciences, University of the Witwatersrand, Johannesburg, South Africa

<sup>7</sup>National Health Laboratory Service, Johannesburg, South Africa

<sup>8</sup>Academy of Science of South Africa

\*Corresponding author: E-mail: carina.schliebusch@ebc.uu.se

Accepted: 12 May 2020

<sup>†</sup>These authors contributed equally to this work.

**Data deposition:** The complete Y-chromosome sequences were deposited on the European Genome Phenome Archive (<https://www.ebi.ac.uk/egp/>), accession number EGAS00001004459, and are available for research use under controlled access policies.

### Abstract

Although the human Y chromosome has effectively shown utility in uncovering facets of human evolution and population histories, the ascertainment bias present in early Y-chromosome variant data sets limited the accuracy of diversity and TMRCA estimates obtained from them. The advent of next-generation sequencing, however, has removed this bias and allowed for the discovery of thousands of new variants for use in improving the Y-chromosome phylogeny and computing estimates that are more accurate. Here, we describe the high-coverage sequencing of the whole Y-chromosome in a data set of 19 male Khoe-San individuals in comparison with existing whole Y-chromosome sequence data. Due to the increased resolution, we potentially resolve the source of haplogroup B-P70 in the Khoe-San, and reconcile recently published haplogroup A-M51 data with the most recent version of the ISOGG Y-chromosome phylogeny. Our results also improve the positioning of tentatively placed new branches of the ISOGG Y-chromosome phylogeny. The distribution of major Y-chromosome haplogroups in the Khoe-San and other African groups coincide with the emerging picture of African demographic history, with E-M2 linked to the agriculturalist Bantu expansion, E-M35 linked to pastoralist eastern African migrations, B-M112 linked to earlier east-south gene flow, A-M14 linked to shared ancestry with central African rainforest hunter-gatherers, and A-M51 potentially unique to the Khoe-San.

**Key words:** Y chromosome, next-generation sequencing, haplogroups, Khoe-San, southern Africa.

### Introduction

The male-specific portion of the Y chromosome (MSY) has long been regarded as an effective tool in the study of human evolutionary history (Underhill and Kivisild 2007). It has proved useful mainly due to a lack of recombination along its length, making it the longest

haplotypic block in the human genome (Sozarkari et al. 2012), and its paternal mode of inheritance. The transmission of an intact haplotype from father to son, changing only through mutation, preserves a simpler record of its history and allows us to study the male contribution to the shaping of humanity.

© The Author(s) 2020. Published by Oxford University Press on behalf of the Society for Molecular Biology and Evolution.

This is an Open Access article distributed under the terms of the Creative Commons Attribution Non-Commercial License (<http://creativecommons.org/licenses/by-nc/4.0/>), which permits non-commercial re-use, distribution, and reproduction in any medium, provided the original work is properly cited. For commercial re-use, please contact journals.permissions@oup.com

Genome Biol. Evol. 12(7): 1031–1039. doi:10.1093/gbe/evaa098

1031

ERB IC18 – CT98 - 0276

Attitudes towards Rainwater Harvesting

Roofwater Harvesting

## Attitudes towards Rainwater Harvesting

### Annex 1: Letter and questionnaire to donor organisations

Dear water professional,

I'm writing this letter in the hope that you may be able to assist us in our research programme, called „Domestic Roofwater Harvesting in the Humid Tropics“. It is a 3-year programme to generate reliable information for water policy planners, water supply professionals and ultimately householders. The programme just started and is funded by the EU. It involves 4 partners from India, Sri Lanka, England and Germany. Links are being developed with practitioners in Central America and East Africa. The programme will examine literature and practice from many parts of the world, but it is expected that those from humid tropical areas will be of most use, since Domestic Rainwater Harvesting technology and economics are dominated by factors like climate and culture.

In the view of water resources getting scarce, it is becoming obvious that we should use every available water resource as e.g. rainfall. Rainwater harvesting has been and is successfully practised for millennia around the Mediterranean as a supplementary source of water or the only one available. In many countries of Asia, Africa and Latin America, it is currently newly introduced or its use widened. One of several components of the programme is to define the information needs of organisations active in the water sector. We would therefore like to ask you about your funding policy for the water sector and how it is implemented in the different countries. We will compile our research findings (we just have started) and will make them available to you if you wish so. They will also be available on a web site, which will soon be established. Please feel free to contact me for any additional information you might want to get.

Thanking you in advance for your time and efforts invested  
- also in the name of the other partners involved

Hans Hartung

Responsible Task Manager for Task B: Institutional Values and Decision Making

# Output: Markdown

## Y-Chromosomal Variation in Southern African Khoe-San Populations Based on Whole-Genome Sequences

Thijssen Naidoo<sup>1,2,3,4,5</sup>, Jingzi Xu<sup>1,6</sup>, Mario Vicente<sup>1</sup>, Helena Malmström<sup>1,5</sup>, Himla Soodyall<sup>7,8</sup>,  
and Matthias Jakobsson<sup>1,3,5</sup>

<sup>1</sup>Human Evolution, Department of Organismal Biology, Evolutionary Biology Centre, Uppsala University, Sweden

<sup>2</sup>Department of Archaeological and Classical Studies, Stockholm University, Sweden

<sup>3</sup>Science for Life Laboratory, Uppsala, Sweden

<sup>4</sup>Centre for Palaeogenetics, Stockholm, Sweden

<sup>5</sup>Palaeo-Research Institute, University of Johannesburg, Auckland Park, South Africa

<sup>6</sup>Division of Human Genetics, School of Pathology, Faculty of Health Sciences, University of the Witwatersrand, Johannesburg, South Africa

<sup>7</sup>National Health Laboratory Service, Johannesburg, South Africa

<sup>8</sup>Academy of Science of South Africa

\*Corresponding author: E-mail: carina.schliebusch@ebc.uu.se. Accessed: 12 May 2020

<sup>†</sup>These authors contributed equally to this work. Data deposition: The complete Y-chromosome sequences were deposited on the European Genome Phenome Archive (<https://www.ebi.ac.uk/egp/>), accession number EGAS00001004459, and are available for research use under controlled access policies.

### Abstract

Although the human Y chromosome has effectively shown utility in uncovering facets of human evolution and population histories, the ascertainment bias present in early Y-chromosome variant data sets limited the accuracy of diversity and TMRCA estimates obtained from them. The advent of next-generation sequencing, however, has removed this bias and allowed for the discovery of thousands of new variants for use in improving the Y-chromosome phylogeny and computing estimates that are more accurate. Here, we describe the high-coverage sequencing of the whole Y-chromosome in a data set of 19 male Khoe-San individuals in comparison with existing whole Y-chromosome sequence data. Due to the increased resolution, we potentially resolve the source of haplogroup B-P70 in the Khoe-San, and reconcile recently published haplogroup A-M51 data with the most recent version of the ISOGG Y-chromosome phylogeny. Our results also improve the positioning of tentatively placed new branches of the ISOGG Y-chromosome phylogeny. The distribution of major Y-chromosome haplogroups in the Khoe-San and other African groups coincide with the emerging picture of African demographic history, with E-M2 linked to the agriculturalist Bantu expansion, E-M35 linked to pastoralist eastern African migrations, B-M112 linked to earlier east-south gene flow, A-M14 linked to shared ancestry with central African rainforest hunter-gatherers, and A-M51 potentially unique to the Khoe-San.

**Key words:** Y chromosome, next-generation sequencing, haplogroups, Khoe-San, southern Africa.

### Introduction

The male-specific portion of the Y chromosome (MSY) has long been regarded as an effective tool in the study of human evolutionary history (Underhill and Kivisild 2007). It has proved useful mainly due to a lack of recombination along its length, making it the longest

haplotypic block in the human genome (Sozarkari et al. 2012), and its patented mode of inheritance. The transmission of an intact haplotype from father to son, changing only through mutation, preserves a simpler record of its history and allows us to study the male contribution to the shaping of humanity.

## Attitudes towards Rainwater Harvesting

Annex 1: Letter and questionnaire to donor organisations

Dear water professional,

I'm writing this letter in the hope that you may be able to assist us in our research programme, called „Domestic Roofwater Harvesting in the Humid Tropics“. It is a 3-year Programme to generate reliable information for water policy planners, water supply professionals and ultimately households. The programme just started and is funded by the EU. It involves 4 partners from India, Sri Lanka, England and Germany. Links are being developed with practitioners in Central America and East Africa. The programme will examine literature and practice from many parts of the world, but it is expected that those from humid tropical areas will be of most use, since Domestic Rainwater Harvesting technology and economics are dominated by factors like climate and culture.

In the view of water resources getting scarce, it is becoming obvious that we should use every available water resource as e.g. rainfall. Rainwater harvesting has been and is successfully practised for millennia around the Mediterranean as a supplementary source of water or the only one available. In many countries of Asia, Africa and Latin America, it is currently newly introduced or its use widened. One of several components of the programme is to define the information needs of organizations active in the water sector. We would therefore like to ask you about your funding policy for the water sector and how it is implemented in the different countries. We will compile our research findings (we just have started) and will make them available to you if you wish so. They will also be available on a web site, which will soon be established. Please feel free to contact me for any additional information you might want to get. Thank you in advance for your time and efforts invested

-also in the name of the other partners involved

Hans Hartung Responsible Task Manager for Task B: Institutional Values and Decision Making

Figure 12. Output of Chimera on Document Context Extraction.

## Input: Document Page

areas. In the first bid book, however, it was noticeable that what the whole of Germany associated with Chemnitz during the application phase, i.e. from August 2018 onward, hardly played a role in the application, namely the riots of right-wing extremist and populists in August 2018. Nevertheless, Chemnitz presented an extensive application overall and demonstrated a good network of cultural actors in the city and the region, so that the selection panel recommended the city for the next round.

Dresden (dropped out of competition in 2019)

Under the motto "New Home Dresden" ("Neue Heimat Dresden"), the Saxon capital presented concepts and projects in its bid book I that were intended to counteract the social division of the city. In numerous artistic actions, some of which were supported by the project office with microcredits, as well as in panel discussions and participative projects such as a postcard campaign, the concept of "home" ("Heimat") was played with in order to find new narratives for the city. This was not only about an open attitude towards immigrants, but also about major present and future tasks that fundamentally change people's lives, such as digitisation. Although Dresden's approach was highly innovative, relevant and authentic, various influential opinion makers such as the German Cultural Council (Deutscher Kulturrat 2019: 14) and the Süddeutsche Zeitung (Heidtmann/ Nimb 2019: online) contrasted the two Saxon competing cities in a questionably simplistic way: poor Chemnitz, which is preceded by a problematic reputation, versus dazzling, privileged Dresden. Whether Dresden really dropped out of the competition at an early stage against the background of this simplistic black-and-white portrayal in the media cannot be proven. In any case, many could not understand the selection panel's assessment (see the Expert Panel's Report of the Pre-Selection Stage / Selection of the European Capital of Culture 2025 in Germany, [https://ec.europa.eu/programmes/creative-europe/actions/capitals-culture\\_en](https://ec.europa.eu/programmes/creative-europe/actions/capitals-culture_en), and a comment at Jacobsen 2020: 22).

Gera (dropped out of competition in 2019)

The Thuringian city with only 95,000 inhabitants dared to go off the beaten track. An association of committed citizens initiated the application and pushed it forward years before the city made a - relatively modest - contribution to the application. Their bid book I presented the historical heritage, and perhaps this common understanding of the interpretation of the past was already a benefit to the city society. However, too few feasible visions of the future were presented, which could be achieved with the ECoc title. All in all, Gera had probably shown too little commitment in the application process to meet the demanding and far-reaching requirements, especially with regard to the other top-class competing cities.

Hanover

The capital of Lower Saxony entered the competition relatively late and then immediately faced special cultural policy challenges: a new mayor was elected during this period, and there was also a change in the cultural administration after a few squabbles, when the former head of the culture department was brought to court. Nevertheless, Hanover managed to submit an exceptionally artistic bid book I, which was awarded a prize not least for its design. Positive aspects of the content were its distinct European dimension and a professionally positioned management, which led to the expectation that the ECoc programme would be very feasible in the fair and Expo city.

143

### INTRODUCTION.

Consider a general-relativistic system — a compact core immersed in a steadily accreting self-gravitating gas. The gravitational binding energy of the infalling gas can be converted to radiation. Assume that an external distant observer can measure total luminosity, asymptotic temperature and redshifts of the radiation. Let be known: the total (asymptotic) mass of the system and the physics of the mixture of gas and radiation. Then it would be natural to ask: what mass is within the compact body? Alternatively, the mass of the core would be known and the total mass would require determination.

The main goal of this paper is the numerical investigation of this problem for stationary flows.

We assume spherical symmetry and adopt thin gas approximation in the transport equation. It is already known from studies of newtonian radiation hydrodynamics [1] — [3] that supersonic flows are generically not fixed by total luminosity, asymptotic temperature and redshift. To each set of such data there can correspond two solutions with different gas abundances. Changing luminosity one obtains two curves, on the luminosity-(gas abundance) diagram, that originate at a bifurcation point. This point is unique, for given boundary data. General-relativistic supersonic flows with small redshifts are similar to newtonian ones in that they also branch from a bifurcation transonic flow. In the case of high redshifts supersonic general-relativistic flows can be absent. A similar picture appears in transonic flows of perfect gases, newtonian or general-relativistic, without radiation. In this case boundary data can consist of the mass accretion rate and the asymptotic speed of sound [4] and the only unique solution — a branching point — corresponds to the maximal accretion.

Accretion systems with subsonic flows are not determined by the data described hitherto. One needs additional information, for instance the asymptotic gas density, in order to specify the solution completely. We discover, however, an interesting fact valid in the newtonian case and in the low-redshift regime of general relativity: transonic flows encompass, on the luminosity-(gas abundance) diagram, the set filled with subsonic flows. Therefore the two transonic branches provide estimates of the mass abundance of corresponding subsonic solutions. In particular, numerical analysis suggests that the most luminous flow is supersonic. This picture is valid in the newtonian level and also in the general-relativistic case, for small redshifts. If redshifts are large, then the boundary of the set of subsonic solutions may consist of transonic or subsonic flows, but it is remarkable that the shape of the set of subsonic solutions is only weakly dependent on redshifts. In

2

## Output: Markdown

areas. In the first bid book, however, it was noticeable that what the whole of Germany associated with Chemnitz during the application phase, i.e. from August 2018 onward, hardly played a role in the application, namely the riot of right-wing extremist and populists in August 2018. Nevertheless, Chemnitz presented an extensive application overall and demonstrated a good network of cultural actors in the city and the region, so that the selection panel recommended the city for the next round.

Dresden (dropped out of competition in 2019) Under the motto "New Home Dresden" ("Neue Heimat Dresden"), the Saxon capital presented concepts and projects in its bid book I that were intended to counteract the social division of the city. In numerous artistic actions, some of which were supported by the project office with microcredits, as well as in panel discussions and participative projects such as a postcard campaign, the concept of "home" ("Heimat") was played within order to find new narratives for the city. This was not only about an open attitude towards migrants, but also about major present and future tasks that fundamentally change people's lives, such as digitisation. Although Dresden's approach was highly innovative, relevant and authentic, various influential opinion makers such as the German Cultural Council (Deutscher Kulturrat 2019: 14) and the Süddeutsche Zeitung (Heidtmann/ Nimb 2019: online) contrasted the two Saxon competing cities in a questionably simplistic way: poor Chemnitz, which is preceded by a problematic reputation, versus dazzling, privileged Dresden. However, Dresden really dropped out of the competition at an early stage against the background of this simplistic black-and-white portrayal in the media cannot be proven. In any case, many could not understand the selection panel's assessment (see the Expert Panel's Report of the Pre-Selection Stage / Selection of the European Capital of Culture 2025 in Germany), <https://eepmora.edu/programmes/creative-euro.pdf> actions/pascal-culture-en, and a comment at Jacobsen 2020: 22).

Gera (dropped out of competition in 2019) The Thuringian city with only 95,000 inhabitants dare go off the beaten track. An association of committed citizens initiated the application and pushed it forward years before the city made a - relatively modest - contribution to the application. Their bidbook I presented the historical heritage, and perhaps this common understanding of the interpretation of the past was already a benefit to the city society. However, too few feasible visions of the future were presented, which could be achieved with the ECoc title. All in all, Gera had probably shown too little commitment in the application process to meet the demanding and far-reaching requirements, especially with regard to the other top-class competing cities.

Hanover The capital of Lower Saxony entered the competition relatively late and then immediately faced special cultural policy challenges: a new mayor was elected during this period, and there was also a change in the cultural administration after a few squabbles, when the former head of the culture department was brought to court. Nevertheless, Hanover managed to submit an exceptionally artistic bidbook I, which was awarded a prize not least for its design. Positive aspects of the content were its distinct European dimension and a professionally positioned management, which led to the expectation that the ECoc programme would be very feasible in the fair and Expo city.

## INTRODUCTION.

Consider a general-relativistic system — a compact core immersed in a steadily accreting self-gravitating gas. The gravitational binding energy of the infalling gas can be converted to radiation. Assume that an external distant observer can measure total luminosity, asymptotic temperature and redshifts of the radiation. Let be known: the total (asymptotic) mass of the system and the physics of the mixture of gas and radiation. Then it would be natural to ask: what mass is within the compact body? Alternatively, the mass of the core would be known and the total mass would require determination.

The main goal of this paper is the numerical investigation of this problem for stationary flows. We assume spherical symmetry and adopt thin gas approximation in the transport equation. It is already known from studies of newtonian radiation hydrodynamics [1] — [3] that supersonic flows are generically not fixed by total luminosity, asymptotic temperature and redshift. To each set of such data there can correspond two solutions with different gas abundances. Changing luminosity one obtains two curves, on the luminosity-(gas abundance) diagram, and originate at a bifurcation point. This point is unique, for given boundary data. General-relativistic supersonic flows with small redshifts are similar to newtonian ones in that they also branch from a bifurcation transonic flow. In the case of high redshifts in supersonic general-relativistic flows can be absent. A similar picture appears in transonic flows of perfect gases, Newtonian or general relativistic, without radiation. In this case boundary data can consist of the mass accretion rate and the asymptotic speed of sound [4] and the only unique solution — a branching point — corresponds to the maximal accretion.

Accretion systems with subsonic flows are not determined by the data described hitherto. One needs additional information, for instance the asymptotic gas density, in order to specify the solution completely. We discover, however, an interesting fact valid in the newtonian case and in the low-redshift regime of general relativity: transonic flows encompass, on the luminosity-(gas abundance) diagram, the set filled with subsonic flows. Therefore the two transonic branches provide estimates of the mass abundance of corresponding subsonic solutions. In particular, numerical analysis suggests that the most luminous flow is supersonic. This picture is valid in the newtonian level and also in the general-relativistic case, for small redshifts. If redshifts are large, then the boundary of the set of subsonic solutions may consist of transonic or subsonic flows, but it is remarkable that the shape of the set of subsonic solutions is only weakly dependent on redshifts. In

Figure 13. Output of Chimera on Document Context Extraction.

## References

- [1] Aida Amini, Saadia Gabriel, Peter Lin, Rik Koncel-Kedziorski, Yejin Choi, and Hannaneh Hajishirzi. Mathqa: Towards interpretable math word problem solving with operation-based formalisms. *arXiv preprint arXiv:1905.13319*, 2019. 1
- [2] Shuaichen Chang, David Palzer, Jialin Li, Eric Fosler-Lussier, and Ningchuan Xiao. Mapqa: A dataset for question answering on choropleth maps. *arXiv preprint arXiv:2211.08545*, 2022. 1
- [3] Jiaqi Chen, Jianheng Tang, Jinghui Qin, Xiaodan Liang, Lingbo Liu, Eric P Xing, and Liang Lin. Geoqa: A geometric question answering benchmark towards multimodal numerical reasoning. *arXiv preprint arXiv:2105.14517*, 2021. 1
- [4] Lin Chen, Jinsong Li, Xiaoyi Dong, Pan Zhang, Conghui He, Jiaqi Wang, Feng Zhao, and Dahua Lin. Sharegpt4v: Improving large multi-modal models with better captions. *arXiv preprint arXiv:2311.12793*, 2023. 1
- [5] Zhe Chen, Weiyun Wang, Hao Tian, Shenglong Ye, Zhangwei Gao, Erfei Cui, Wenwen Tong, Kongzhi Hu, Jiapeng Luo, Zheng Ma, et al. How far are we to gpt-4v? closing the gap to commercial multimodal models with open-source suites. *arXiv preprint arXiv:2404.16821*, 2024. 1, 2, 5, 6
- [6] Chaoyou Fu, Peixian Chen, Yunhang Shen, Yulei Qin, Mengdan Zhang, Xu Lin, Jinrui Yang, Xiawu Zheng, Ke Li, Xing Sun, et al. Mme: A comprehensive evaluation benchmark for multimodal large language models. *arXiv preprint arXiv:2306.13394*, 2023. 1
- [7] Jiahui Gao, Renjie Pi, Jipeng Zhang, Jiacheng Ye, Wanjun Zhong, Yufei Wang, Lanqing Hong, Jianhua Han, Hang Xu, Zhenguo Li, et al. G-llava: Solving geometric problem with multi-modal large language model. *arXiv preprint arXiv:2312.11370*, 2023. 1
- [8] Kaiming He, Xiangyu Zhang, Shaoqing Ren, and Jian Sun. Deep residual learning for image recognition. In *Proceedings of the IEEE conference on computer vision and pattern recognition*, pages 770–778, 2016. 2
- [9] Anwen Hu, Haiyang Xu, Liang Zhang, Jiabo Ye, Ming Yan, Ji Zhang, Qin Jin, Fei Huang, and Jingren Zhou. mplug-docowl2: High-resolution compressing for ocr-free multi-page document understanding. *arXiv preprint arXiv:2409.03420*, 2024. 1
- [10] Justin Johnson, Bharath Hariharan, Laurens Van Der Maaten, Li Fei-Fei, C Lawrence Zitnick, and Ross Girshick. Clevr: A diagnostic dataset for compositional language and elementary visual reasoning. In *Proceedings of the IEEE conference on computer vision and pattern recognition*, pages 2901–2910, 2017. 1
- [11] Jeff Johnson, Matthijs Douze, and Hervé Jégou. Billion-scale similarity search with GPUs. *IEEE Transactions on Big Data*, 7(3):535–547, 2019. 2
- [12] Kushal Kafe, Brian Price, Scott Cohen, and Christopher Kanan. Dvqa: Understanding data visualizations via question answering. In *Proceedings of the IEEE conference on computer vision and pattern recognition*, pages 5648–5656, 2018. 1
- [13] Samira Ebrahimi Kahou, Vincent Michalski, Adam Atkinson, Ákos Kádár, Adam Trischler, and Yoshua Bengio. Figureqa: An annotated figure dataset for visual reasoning. *arXiv preprint arXiv:1710.07300*, 2017. 1
- [14] Shankar Kantharaj, Rixie Tiffany Ko Leong, Xiang Lin, Ahmed Masry, Megh Thakkar, Enamul Hoque, and Shafiq Joty. Chart-to-text: A large-scale benchmark for chart summarization. *arXiv preprint arXiv:2203.06486*, 2022. 1
- [15] Mehran Kazemi, Hamidreza Alvari, Ankit Anand, Jialin Wu, Xi Chen, and Radu Soricut. Geomverse: A systematic evaluation of large models for geometric reasoning. *arXiv preprint arXiv:2312.12241*, 2023. 1
- [16] Aniruddha Kembhavi, Mike Salvato, Eric Kolve, Minjoon Seo, Hannaneh Hajishirzi, and Ali Farhadi. A diagram is worth a dozen images. In *Computer Vision—ECCV 2016: 14th European Conference, Amsterdam, The Netherlands, October 11–14, 2016, Proceedings, Part IV 14*, pages 235–251. Springer, 2016. 1
- [17] Aniruddha Kembhavi, Minjoon Seo, Dustin Schwenk, Jonghyun Choi, Ali Farhadi, and Hannaneh Hajishirzi. Are you smarter than a sixth grader? textbook question answering for multimodal machine comprehension. In *Proceedings of the IEEE Conference on Computer Vision and Pattern Recognition*, pages 4999–5007, 2017. 1
- [18] Bo Li, Yuanhan Zhang, Dong Guo, Renrui Zhang, Feng Li, Hao Zhang, Kaichen Zhang, Yanwei Li, Ziwei Liu, and Chunyuan Li. Llava-onevision: Easy visual task transfer. *arXiv preprint arXiv:2408.03326*, 2024. 1, 5
- [19] Lei Li, Yuqi Wang, Runxin Xu, Peiyi Wang, Xiachong Feng, Lingpeng Kong, and Qi Liu. Multimodal arxiv: A dataset for improving scientific comprehension of large vision-language models. *arXiv preprint arXiv:2403.00231*, 2024. 1
- [20] Zhuowan Li, Xingrui Wang, Elias Stengel-Eskin, Adam Kortylewski, Wufei Ma, Benjamin Van Durme, and Alan L Yuille. Super-clevr: A virtual benchmark to diagnose domain robustness in visual reasoning. In *Proceedings of the IEEE/CVF Conference on Computer Vision and Pattern Recognition*, pages 14963–14973, 2023. 1
- [21] Will Lifferth, Walter Reade, and Addison Howard. Kaggle - llm science exam. <https://kaggle.com/competitions/kaggle-llm-science-exam>, 2023. Kaggle. 1
- [22] Fuxiao Liu, Kevin Lin, Linjie Li, Jianfeng Wang, Yaser Yacoob, and Lijuan Wang. Aligning large multi-modal model with robust instruction tuning. *arXiv preprint arXiv:2306.14565*, 2023. 1
- [23] Pan Lu, Ran Gong, Shibiao Jiang, Liang Qiu, Siyuan Huang, Xiaodan Liang, and Song-Chun Zhu. Inter-gps: Interpretable geometry problem solving with formal language and symbolic reasoning. In *The 59th Annual Meeting of the Association for Computational Linguistics (ACL)*, 2021. 1
- [24] Pan Lu, Liang Qiu, Jiaqi Chen, Tony Xia, Yizhou Zhao, Wei Zhang, Zhou Yu, Xiaodan Liang, and Song-Chun Zhu. Iconqa: A new benchmark for abstract diagram understanding and visual language reasoning. *arXiv preprint arXiv:2110.13214*, 2021. 1
- [25] Pan Lu, Hritik Bansal, Tony Xia, Jiacheng Liu, Chunyuan Li, Hannaneh Hajishirzi, Hao Cheng, Kai-Wei Chang, Michel

- Galley, and Jianfeng Gao. Mathvista: Evaluating mathematical reasoning of foundation models in visual contexts. *arXiv preprint arXiv:2310.02255*, 2023. 3
- [26] Pan Lu, Liang Qiu, Kai-Wei Chang, Ying Nian Wu, Song-Chun Zhu, Tanmay Rajpurohit, Peter Clark, and Ashwin Kalyan. Dynamic prompt learning via policy gradient for semi-structured mathematical reasoning. In *International Conference on Learning Representations (ICLR)*, 2023. 1
- [27] Ahmed Masry, Do Xuan Long, Jia Qing Tan, Shafiq Joty, and Enamul Hoque. Chartqa: A benchmark for question answering about charts with visual and logical reasoning. *arXiv preprint arXiv:2203.10244*, 2022. 1
- [28] Ahmed Masry, Megh Thakkar, Aayush Bajaj, Aaryaman Kartha, Enamul Hoque, and Shafiq Joty. Chartgemma: Visual instruction-tuning for chart reasoning in the wild. *arXiv preprint arXiv:2407.04172*, 2024. 1
- [29] Minesh Mathew, Dimosthenis Karatzas, and CV Jawahar. Docvqa: A dataset for vqa on document images. In *Proceedings of the IEEE/CVF winter conference on applications of computer vision*, pages 2200–2209, 2021. 1
- [30] Nitesh Methani, Pritha Ganguly, Mitesh M Khapra, and Pratyush Kumar. Plotqa: Reasoning over scientific plots. In *Proceedings of the IEEE/CVF Winter Conference on Applications of Computer Vision*, pages 1527–1536, 2020. 1
- [31] Arindam Mitra, Hamed Khanpour, Corby Rosset, and Ahmed Awadallah. Orca-math: Unlocking the potential of slms in grade school math, 2024. 1
- [32] Tanik Saikh, Tirthankar Ghosal, Amish Mittal, Asif Ekbal, and Pushpak Bhattacharyya. Scienceqa: A novel resource for question answering on scholarly articles. *International Journal on Digital Libraries*, 23(3):289–301, 2022. 1
- [33] Leyang Shen, Gongwei Chen, Rui Shao, Weili Guan, and Liqiang Nie. Mome: Mixture of multimodal experts for generalist multimodal large language models. *arXiv preprint arXiv:2407.12709*, 2024. 3
- [34] Benny J Tang, Angie Boggust, and Arvind Satyanarayan. Vistext: A benchmark for semantically rich chart captioning. *arXiv preprint arXiv:2307.05356*, 2023. 1
- [35] Shengbang Tong, Ellis Brown, Penghao Wu, Sanghyun Woo, Manoj Middepogu, Sai Charitha Akula, Jihan Yang, Shusheng Yang, Adithya Iyer, Xichen Pan, et al. Cambrian-1: A fully open, vision-centric exploration of multimodal llms. *arXiv preprint arXiv:2406.16860*, 2024. 1
- [36] Ke Wang, Juntong Pan, Weikang Shi, Zimu Lu, Mingjie Zhan, and Hongsheng Li. Measuring multimodal mathematical reasoning with math-vision dataset, 2024. 1
- [37] Haoran Wei, Chenglong Liu, Jinyue Chen, Jia Wang, Lingyu Kong, Yanming Xu, Zheng Ge, Liang Zhao, Jianjian Sun, Yuang Peng, et al. General ocr theory: Towards ocr-2.0 via a unified end-to-end model. *arXiv preprint arXiv:2409.01704*, 2024. 1
- [38] Renqiu Xia, Bo Zhang, Haoyang Peng, Hancheng Ye, Xiangchao Yan, Peng Ye, Botian Shi, Yu Qiao, and Junchi Yan. Structchart: Perception, structuring, reasoning for visual chart understanding. *arXiv preprint arXiv:2309.11268*, 2023. 1
- [39] Renqiu Xia, Song Mao, Xiangchao Yan, Hongbin Zhou, Bo Zhang, Haoyang Peng, Jiahao Pi, Daocheng Fu, Wenjie Wu, Hancheng Ye, et al. Docgenome: An open large-scale scientific document benchmark for training and testing multi-modal large language models. *arXiv preprint arXiv:2406.11633*, 2024. 1
- [40] Renqiu Xia, Bo Zhang, Hancheng Ye, Xiangchao Yan, Qi Liu, Hongbin Zhou, Zijun Chen, Min Dou, Botian Shi, Junchi Yan, et al. Chartx & chartvlm: A versatile benchmark and foundation model for complicated chart reasoning. *arXiv preprint arXiv:2402.12185*, 2024. 1
- [41] Xiang Yue, Xingwei Qu, Ge Zhang, Yao Fu, Wenhao Huang, Huan Sun, Yu Su, and Wenhua Chen. Mammoth: Building math generalist models through hybrid instruction tuning. *arXiv preprint arXiv:2309.05653*, 2023. 1
- [42] Dan Zhang, Ziniu Hu, Sining Zhou, Zhengxiao Du, Kaiyu Yang, Zihan Wang, Yisong Yue, Yuxiao Dong, and Jie Tang. Sciglm: Training scientific language models with self-reflective instruction annotation and tuning. *arXiv preprint arXiv:2401.07950*, 2024. 1
- [43] Renrui Zhang, Xinyu Wei, Dongzhi Jiang, Yichi Zhang, Ziyu Guo, Chengzhuo Tong, Jiaming Liu, Aojun Zhou, Bin Wei, Shanghang Zhang, et al. Mavis: Mathematical visual instruction tuning. *arXiv preprint arXiv:2407.08739*, 2024. 1
- [44] Yanzhe Zhang, Ruiyi Zhang, Jiuxiang Gu, Yufan Zhou, Nidhi Lipka, Diyi Yang, and Tong Sun. Llavav: Enhanced visual instruction tuning for text-rich image understanding. *arXiv preprint arXiv:2306.17107*, 2023. 1
- [45] Mingyu Zheng, Xinwei Feng, Qingyi Si, Qiaoqiao She, Zheng Lin, Wenbin Jiang, and Weiping Wang. Multimodal table understanding. *arXiv preprint arXiv:2406.08100*, 2024. 1
- [46] Zhuofan Zong, Bingqi Ma, Dazhong Shen, Guanglu Song, Hao Shao, Dongzhi Jiang, Hongsheng Li, and Yu Liu. Mova: Adapting mixture of vision experts to multimodal context. *arXiv preprint arXiv:2404.13046*, 2024. 3
